# Supplementary material for: Transition-metal solvated-electron precursors: diffuse and 3d electrons in V(NH3)0,±6
Source: Royal Society of Chemistry journal article supplement (doi:10.1039/c8cp07420h), 2019-01-01
Supplement: c8cp07420h1.pdf [file c8cp07420h1.pdf]

**Electronic Supplementary Information**

**Transition-metal solvated-electron precursors:  
Diffuse and 3d electrons in  $V(NH_3)_6^{0,\pm}$**

Nuno M. S. Almeida, Filip Pawłowski, Joseph Vincent Ortiz, and Evangelos Miliordos\*

Department of Chemistry and Biochemistry, Auburn University,  
Auburn, AL 36849, USA

\* To whom correspondence should be addressed. E-mail: [emiliord@auburn.edu](mailto:emiliord@auburn.edu)

### Detailed analysis on the excited states of V(NH<sub>3</sub>)<sub>6</sub>

CASSCF and CASPT2 excited-state energies at the optimal C<sub>2v</sub> structure for the ground <sup>4</sup>A<sub>2g</sub> state of Figure 1 are tabulated in Table 4. The 3d orbitals of vanadium split into two groups of nearly degenerate orbitals because of the pseudo-octahedral structure of V(NH<sub>3</sub>)<sub>6</sub>. The approximate t<sub>2g</sub> group consists of the three 3d orbitals which have vanishing amplitudes on the V-N axes, whereas its e<sub>g</sub> counterpart has two orbitals with high amplitudes aligned with the V-N axes that are destabilized by σ\* anti-bonding phase relationships. All five orbitals are illustrated in Figure 4 along with selected 1s, 1p and 1d outer orbitals.

The ground state has a t<sub>2g</sub><sup>3</sup>1s<sup>2</sup> electronic configuration with three t<sub>2g</sub> electrons coupled into a quartet (<sup>4</sup>A<sub>2g</sub>). The lowest states pertain to transitions between diffuse orbitals. Several states with dominant 1s<sup>1</sup>1p<sup>1</sup>, 1p<sup>2</sup> and 1s<sup>1</sup>1d<sup>1</sup> configurations retain their three, quartet-coupled electrons in t<sub>2g</sub> orbitals.

For <sup>6,4,2</sup>T<sub>2u</sub> states, the chief configurations result from coupling a <sup>4</sup>A<sub>2g</sub> multiplet arising from the inner t<sub>2g</sub><sup>3</sup> configuration to the nine states of the <sup>3</sup>P term generated by 1s<sup>1</sup>1p<sup>1</sup>. Because these states are closely spaced, with 0.541 ≤ T<sub>e</sub> ≤ 0.573, couplings between inner and outer orbitals must be weak. Averages of the sextet, quartet and doublet energies are 0.55-0.56 eV above the ground state.

When two diffuse electrons are in a 1p<sup>2</sup> configuration, <sup>3</sup>P, <sup>1</sup>D and <sup>1</sup>S terms result. In <sup>6,2</sup>T<sub>2g</sub> states, inner <sup>4</sup>A<sub>2g</sub> and outer <sup>3</sup>P terms from 1p<sup>2</sup> electrons are coupled to each other. Outer electrons in 1s<sup>1</sup>1d<sup>1</sup> configurations produce <sup>3</sup>D and <sup>1</sup>D terms. The former term couples with the inner <sup>4</sup>A<sub>2g</sub> multiplet to produce <sup>6,2</sup>T<sub>1g</sub> and <sup>6,2</sup>E<sub>g</sub> states. In the remaining quartets with outer-outer excitations, more complicated configuration mixing that descends from more than one of the three outer-electron terms results.

The first t<sub>2g</sub> → e<sub>g</sub> transitions to <sup>4</sup>T<sub>2g</sub> states occur at ~1.75 eV with CASPT2. No 3d ↔ diffuse transitions in the first forty-five states of V(NH<sub>3</sub>)<sub>6</sub> up to approximately 2.0 eV were found.

Table 4 lists both CASSCF and CASPT2 excitation energies. The latter are consistently larger by an averaged difference of δE = 0.236 eV. This value is close to the difference found for Li(NH<sub>3</sub>)<sub>4</sub> and Na(NH<sub>3</sub>)<sub>4</sub>, where excitations between only outer orbitals are present.<sup>1</sup> In cases where CASPT2 failed to converge, an estimated value is obtained by adding δE to the CASSCF result.

## Detailed analysis on the excited states of $V(NH_3)_6^+$

As an electron departs from the outer  $1s$  orbital, the ground state configuration of the cation is  $t_{2g}^3 ({}^4A_{2g}) 1s^1 ({}^2S)$ . Spin coupling between  $t_{2g}^3 ({}^4A_{2g})$  and  $1s^1 ({}^2S)$  generates  ${}^3A_{2g}$  and  ${}^5A_{2g}$  states which are practically degenerate (See Table 5; the optimized quintet's structure is used in calculations of vertical excitation energies). CASSCF and P3+ favor the quintet state by 0.016 and 0.012 eV, but CASPT2 favors the triplet by only 0.004 eV. Close agreement between wavefunction and electron-propagator results confirms the one-electron character of the electron detachment from the ground state of  $V(NH_3)_6$ .

As in the neutral system, the first excited states are created via  $1s \rightarrow 1p$  promotion. These  ${}^5T_{2u}$  and  ${}^3T_{2u}$  states are also nearly degenerate with their six spatial components lying 0.972–1.003 (CASPT2) or 0.994–1.012 (P3+) eV above the ground state. Such agreement between CASPT2 and P3+ results supports the  $1s \rightarrow 1p$  description of these excitations.

Next, transitions only within the 3d-shell take place. At first, a  $t_{2g}$  electron moves to an  $e_g$  orbital. The resulting  ${}^4T_{2g} (t_{2g}^2 e_g^1)$  state couples with the  $1s^1$  electron to produce the nearly degenerate  ${}^3T_{2g}$  and  ${}^5T_{2g}$  states. The next states involve an internal  $t_{2g}$  transition. The  $t_{2g}^3$  electrons are coupled to a doublet, making a five-fold degenerate state that resembles  ${}^2D (2s^2 2p^3)$  in the nitrogen atom. Under  $O_h$  symmetry, these five components split into  ${}^2T_{2g} + {}^2E_g$ , which combined with diffuse  ${}^2S (1s^1)$ , give the  ${}^1,{}^3T_{2g} + {}^1,{}^3E_g$  states in the 1.821 - 1.922 eV range.

The last manifold of states studied with CASPT2,  ${}^3,{}^5T_{1g} + {}^3,{}^5E_g$ , is related to the diffuse  $1s \rightarrow 1d$  transition from the ground state. Small splittings between twin triplet and quintet states for  $V(NH_3)_6^+$  are an additional indication of the weak spin coupling between inner and outer electrons. P3+ and CASPT2 results again are in close agreement and confirm the one-electron character of this set of transitions.

Excitations to higher diffuse orbitals were also calculated with the P3+ approach. Excitations to triplets and quintets with  $t_{2g}^3 2s^1 ({}^3,{}^5A_{2g})$ ,  $t_{2g}^3 1f^1 ({}^3,{}^5A_{1u}, {}^3,{}^5T_{1u}, {}^3,{}^5T_{2u})$ , and  $t_{2g}^3 2p^1 ({}^3,{}^5T_{2u})$  electronic configurations were obtained. These states lie between 2.387 and 3.260 eV with a  $2s^1 \approx 1f^1 < 2p^1$  energy order (see Table 5). Non-spherical symmetry allows two  $1f^1$  states,  ${}^3,{}^5A_{1u}$ , to lie below  $2s^1$  ones ( ${}^3,{}^5A_{2g}$ ). Similar interleaving was observed for  $Be(NH_3)_4$ .<sup>2</sup> As a result, the Aufbau principle reported here for  $V(NH_3)_6^+$  is identical to that of  $Be(NH_3)_4$ .<sup>2</sup> Representative Dyson orbitals for electron attachment to the dication are shown in Figure 7 for quintet states. For triplet states, the same shapes of Dyson orbitals were obtained and therefore

the labels numbering Dyson orbitals in the last column of Table 5 are identical for quintet and corresponding triplet states.

Dynamic correlation effects differ with respect to inner-electron configurations. CASPT2 predicts larger  $T_e$  values than CASSCF by an average of 0.278 eV for states with  $t_{2g}^3$  ( $^4A_{2g}$ ) configurations. The corresponding shift for the neutral complex is 0.236 eV (see Section IIIB). This trend is diminished in the six  $T_e$  values for  $^{3,5}T_{2g}$  states with  $t_{2g}^2 e_g^1$  ( $^4T_{2g}$ ) character, where the dynamic correlation shifts are  $0.050 \pm 0.011$  eV, with an average of 0.053 eV. In  $t_{2g}^3$  doublet ( $^2T_{2g}+^2E_g$ ) states, the opposite effect is obtained, for CASPT2 values are lower than CASSCF ones by  $0.206 \pm 0.017$  eV, with an average of 0.212 eV.

Because dynamic electron correlation effects are similar for the cationic and neutral systems with  $t_{2g}^3$  ( $^4A_{2g}$ ) states, the 0.053 eV correction may be added to the highest  $^4T_{2g}$  state components of Table 4 for  $V(NH_3)_6$ . This state has a  $t_{2g}^2 e_g^1$  ( $^4T_{2g}$ ) character and CASPT2 calculations were not possible for its components.

Excitation energies for states calculated with CASPT2 and P3+ are in very good agreement. The two sets of values differ on average by  $\sim 0.02$  eV or  $\sim 1.5\%$  (see Table 5). Consideration of V 3s and 3p electron correlation in geometry optimization and in P3+ calculations increases  $T_e$  values by only 0.015 eV or  $\sim 1\%$ , on average. These results suggest that the inclusion of computationally expensive outer-core correlation can be avoided in future calculations for similar systems when 1% accuracy is sufficient.

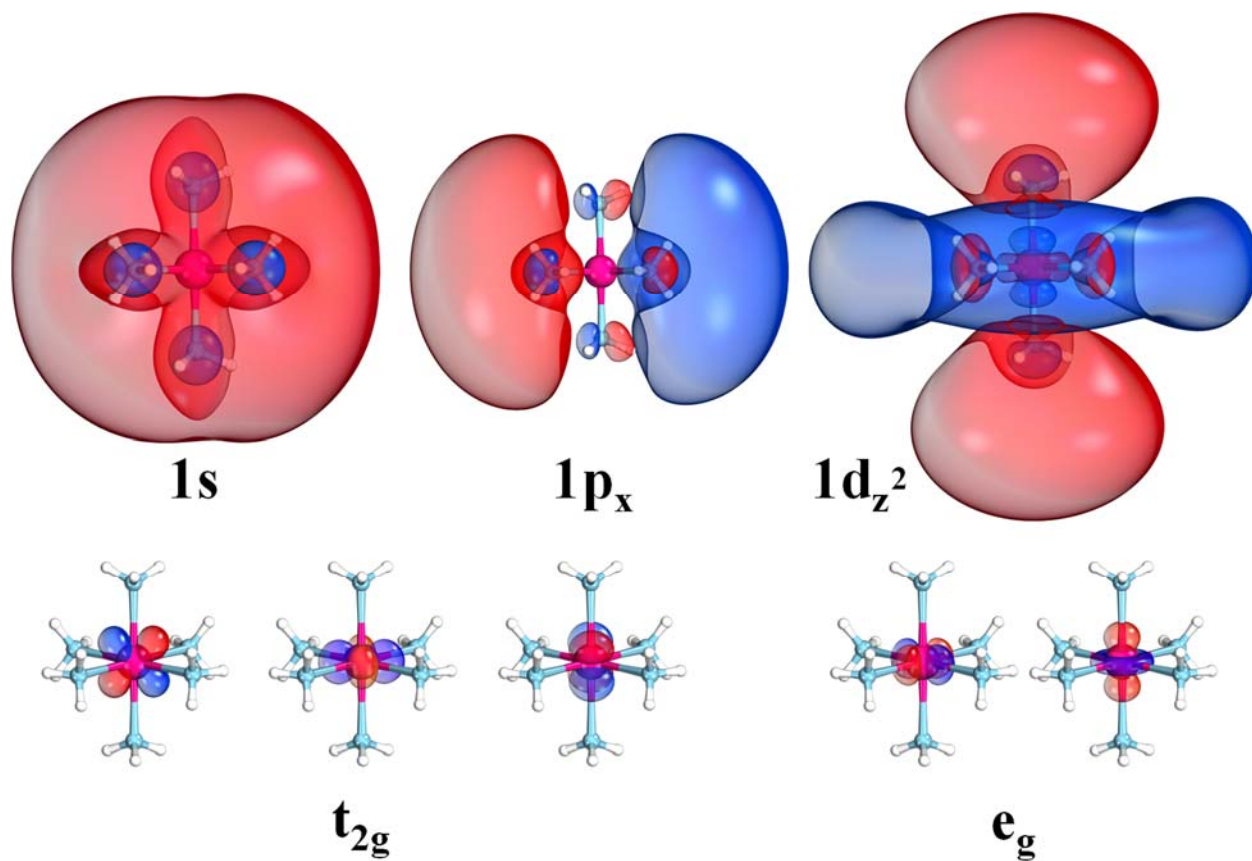

**Figure S1.** All five inner 3d orbitals ( $t_{2g}$  and  $e_g$ ) and selected outer diffuse molecular orbitals of  $V(NH_3)_6$ .

**Table S1.** Cartesian coordinates (Å) for the  $V(\text{NH}_3)_{n=1-6}^{0,\pm}$  species optimized at MP2/cc-pVTZ(V,N) aug-cc-pVTZ(H).

| $V(\text{NH}_3)$   |          |          |          | $V(\text{NH}_3)^+$   |          |          |          | $V(\text{NH}_3)^-$   |          |          |          |
|--------------------|----------|----------|----------|----------------------|----------|----------|----------|----------------------|----------|----------|----------|
| V                  | -0.70406 | 0.00000  | 0.00002  | V                    | -0.69081 | 0.00000  | 0.00001  | V                    | -0.72295 | 0.00001  | 0.00001  |
| N                  | 1.50638  | -0.00005 | 0.00009  | N                    | 1.46786  | 0.00000  | 0.00005  | N                    | 1.53975  | 0.00003  | -0.00001 |
| H                  | 1.88207  | 0.31178  | -0.89345 | H                    | 1.87075  | -0.01494 | -0.93532 | H                    | 1.94947  | -0.80830 | -0.47548 |
| H                  | 1.88335  | 0.61795  | 0.71609  | H                    | 1.87137  | 0.81736  | 0.45447  | H                    | 1.95005  | 0.81581  | -0.46205 |
| H                  | 1.88332  | -0.92931 | 0.17641  | H                    | 1.87138  | -0.80244 | 0.48033  | H                    | 1.95007  | -0.00788 | 0.93749  |
| $V(\text{NH}_3)_2$ |          |          |          | $V(\text{NH}_3)_2^+$ |          |          |          | $V(\text{NH}_3)_2^-$ |          |          |          |
| V                  | 0.00000  | 0.00000  | 0.00000  | V                    | 0.00000  | 0.00000  | 0.00000  | V                    | 0.00000  | 0.00000  | 0.00000  |
| N                  | 0.00000  | 2.17887  | 0.00000  | N                    | 0.00000  | 2.19372  | 0.00000  | N                    | 0.00000  | 2.25317  | 0.00000  |
| H                  | -0.94884 | 2.54923  | 0.00000  | H                    | -0.93349 | 2.59777  | 0.00000  | H                    | -0.94764 | 2.63059  | 0.00000  |
| H                  | 0.47608  | 2.54535  | 0.82264  | H                    | 0.46810  | 2.59469  | 0.00000  | H                    | 0.47496  | 2.62782  | 0.82132  |
| N                  | 0.00000  | -2.17887 | 0.00000  | N                    | 0.00000  | -2.19372 | 0.00000  | N                    | -0.00000 | -2.25317 | 0.00000  |
| H                  | -0.47608 | -2.54535 | -0.82264 | H                    | -0.46810 | -2.59469 | -0.80924 | H                    | -0.47496 | -2.62782 | -0.82132 |
| H                  | 0.94884  | -2.54923 | 0.00000  | H                    | 0.93349  | -2.59777 | 0.00000  | H                    | 0.94764  | -2.63059 | 0.00000  |
| H                  | 0.47608  | -2.54535 | 0.82264  | H                    | -0.46810 | -2.59469 | 0.80924  | H                    | -0.47496 | -2.62782 | 0.82132  |
| H                  | 0.47608  | 2.54535  | -0.82264 | H                    | 0.46810  | 2.59469  | -0.80924 | H                    | 0.47496  | 2.62782  | -0.82132 |
| $V(\text{NH}_3)_3$ |          |          |          | $V(\text{NH}_3)_3^+$ |          |          |          | $V(\text{NH}_3)_3^-$ |          |          |          |
| V                  | 0.02614  | -0.43044 | -0.00038 | V                    | 0.01888  | -0.32016 | -0.00005 | V                    | -0.00142 | -0.47323 | -0.00010 |
| N                  | 2.22110  | -0.41638 | 0.00039  | N                    | 2.22878  | -0.59185 | 0.00014  | N                    | 2.21033  | -0.40769 | -0.00011 |
| H                  | 2.58991  | 0.06106  | -0.82254 | H                    | 2.67241  | -0.17466 | -0.81348 | H                    | 2.59041  | 0.10042  | -0.80360 |
| H                  | 2.58947  | 0.06036  | 0.82393  | H                    | 2.67253  | -0.17261 | 0.81263  | H                    | 2.59042  | 0.10095  | 0.80305  |
| N                  | -0.10308 | 1.82027  | -0.00002 | N                    | -0.08580 | 1.92766  | -0.00012 | N                    | -0.00790 | 1.77612  | 0.00017  |
| H                  | -0.61344 | 2.15298  | -0.82298 | H                    | -0.57818 | 2.29685  | -0.80912 | H                    | -0.50268 | 2.14693  | -0.81213 |
| H                  | -0.60851 | 2.15287  | 0.82602  | H                    | -0.57129 | 2.29680  | 0.81308  | H                    | -0.50016 | 2.14658  | 0.81417  |
| N                  | -2.16620 | -0.52672 | 0.00040  | N                    | -2.17946 | -0.68749 | 0.00005  | N                    | -2.19812 | -0.41400 | 0.00011  |
| H                  | -2.51580 | -1.48201 | -0.00058 | H                    | -2.43871 | -1.67014 | -0.00009 | H                    | -2.62211 | -1.34116 | 0.00021  |
| H                  | -2.55922 | -0.07027 | 0.82510  | H                    | -2.64349 | -0.29123 | 0.81273  | H                    | -2.58032 | 0.07219  | 0.81873  |
| H                  | -2.55985 | -0.06850 | -0.82303 | H                    | -2.64364 | -0.29098 | -0.81242 | H                    | -2.58057 | 0.07209  | -0.81844 |
| H                  | 0.79511  | 2.30618  | -0.00264 | H                    | 0.81701  | 2.39255  | -0.00400 | H                    | 0.91532  | 2.21194  | -0.00111 |
| H                  | 2.61833  | -1.35276 | 0.00002  | H                    | 2.53451  | -1.56112 | 0.00135  | H                    | 2.69209  | -1.30651 | 0.00013  |

| $V(NH_3)_4$ |          |          |          | $V(NH_3)_4^+$ |          |          |          | $V(NH_3)_4^-$ |          |          |          |
|-------------|----------|----------|----------|---------------|----------|----------|----------|---------------|----------|----------|----------|
| V           | 0.00002  | -0.00006 | -0.00041 | V             | 0.00005  | -0.00001 | -0.00004 | V             | -0.00003 | 0.00007  | 0.00954  |
| N           | -1.56146 | -1.57792 | 0.00000  | N             | 1.63960  | -1.56677 | -0.00020 | N             | 1.46374  | 1.67842  | -0.00743 |
| N           | 1.57816  | -1.56124 | 0.00026  | N             | 1.56674  | 1.63963  | 0.00021  | N             | 1.67856  | -1.46349 | -0.00269 |
| N           | 1.56131  | 1.57803  | 0.00002  | N             | -1.63965 | 1.56671  | -0.00020 | N             | -1.46352 | -1.67857 | -0.00721 |
| H           | 1.48141  | -2.15845 | -0.82278 | H             | 2.17644  | 1.58345  | -0.81064 | H             | 2.29203  | -1.36367 | 0.80701  |
| H           | 1.48158  | -2.15709 | 0.82430  | H             | 2.17553  | 1.58403  | 0.81179  | H             | 2.28517  | -1.35945 | -0.81708 |
| H           | -2.16129 | -1.47905 | -0.82085 | H             | 1.58251  | -2.17717 | -0.81046 | H             | 1.41305  | 2.25059  | 0.83633  |
| H           | -2.15465 | -1.48377 | 0.82628  | H             | 1.58471  | -2.17485 | 0.81196  | H             | 1.31334  | 2.32489  | -0.78300 |
| H           | 2.16044  | 1.47995  | -0.82147 | H             | -1.58271 | 2.17698  | -0.81056 | H             | -1.36516 | -2.29290 | 0.80205  |
| H           | 2.15537  | 1.48317  | 0.82557  | H             | -1.58472 | 2.17491  | 0.81187  | H             | -1.35799 | -2.28429 | -0.82207 |
| N           | -1.57804 | 1.56128  | 0.00016  | N             | -1.56679 | -1.63956 | 0.00020  | N             | -1.67873 | 1.46351  | -0.00208 |
| H           | -2.54022 | 1.22606  | -0.00460 | H             | -1.21330 | -2.59098 | -0.00102 | H             | -1.39424 | 2.44407  | -0.00328 |
| H           | -1.47902 | 2.16212  | -0.81993 | H             | -2.17697 | -1.58285 | -0.81025 | H             | -2.29201 | 1.36352  | 0.80780  |
| H           | 2.54042  | -1.22627 | -0.00018 | H             | 1.21308  | 2.59099  | -0.00029 | H             | 1.39395  | -2.44401 | -0.00424 |
| H           | -1.22620 | -2.54007 | -0.00425 | H             | 2.59101  | -1.21327 | -0.00199 | H             | 2.44183  | 1.39499  | -0.08087 |
| H           | 1.22616  | 2.54023  | -0.00295 | H             | -2.59102 | 1.21311  | -0.00182 | H             | -2.44407 | -1.39398 | -0.00993 |
| H           | -1.48413 | 2.15357  | 0.82713  | H             | -2.17508 | -1.58426 | 0.81218  | H             | -2.28554 | 1.35955  | -0.81629 |
| $V(NH_3)_5$ |          |          |          | $V(NH_3)_5^+$ |          |          |          | $V(NH_3)_5^-$ |          |          |          |
| V           | -0.00202 | -0.01015 | -0.31041 | V             | 0.00000  | 0.00140  | -0.26925 | V             | -0.00007 | 0.01219  | -0.27852 |
| N           | 0.01680  | 0.08472  | 1.94583  | N             | -1.60511 | -1.59182 | -0.36958 | N             | -1.58589 | -1.56476 | -0.39316 |
| H           | 0.79521  | -0.42435 | 2.37394  | H             | -1.74480 | -1.65655 | -1.37687 | H             | -1.86178 | -1.71349 | -1.36204 |
| H           | 0.09635  | 1.04269  | 2.30011  | H             | -1.37565 | -2.53355 | -0.06249 | H             | -1.29308 | -2.47234 | -0.02923 |
| N           | 1.75308  | 1.38957  | -0.36339 | H             | -2.51954 | -1.39069 | 0.02729  | H             | -2.43454 | -1.32508 | 0.12111  |
| H           | 2.58557  | 1.04784  | 0.11558  | N             | 1.60546  | -1.59147 | -0.36961 | N             | 1.59611  | -1.55426 | -0.39339 |
| H           | 2.01167  | 1.52984  | -1.33832 | H             | 2.51987  | -1.39010 | 0.02720  | H             | 2.44323  | -1.30900 | 0.12075  |
| N           | -1.41604 | 1.73370  | -0.35848 | H             | 1.37624  | -2.53323 | -0.06243 | H             | 1.30929  | -2.46372 | -0.02938 |
| H           | -1.64851 | 1.91884  | -1.33252 | H             | 1.74509  | -1.65622 | -1.37690 | H             | 1.87282  | -1.70123 | -1.36231 |
| H           | -2.29732 | 1.58220  | 0.13098  | N             | 1.59560  | 1.60702  | -0.34261 | N             | 1.57046  | 1.60882  | -0.30899 |
| N           | -1.74923 | -1.42283 | -0.29320 | H             | 1.38902  | 2.52261  | 0.04884  | H             | 1.31488  | 2.45439  | 0.20209  |
| H           | -1.95309 | -1.65200 | -1.26459 | H             | 2.53420  | 1.37901  | -0.02477 | H             | 2.47365  | 1.31920  | 0.06730  |
| H           | -1.58782 | -2.30567 | 0.18957  | H             | 1.67105  | 1.74412  | -1.34972 | H             | 1.73076  | 1.88629  | -1.27607 |
| N           | 1.39907  | -1.76653 | -0.29959 | N             | 0.00003  | -0.03518 | 2.04295  | N             | 0.00067  | -0.11069 | 1.95489  |
| H           | 1.54111  | -2.03848 | -1.27093 | H             | -0.80735 | 0.42342  | 2.45508  | H             | -0.81330 | 0.32492  | 2.40058  |
| H           | 2.32245  | -1.58156 | 0.08978  | H             | -0.00007 | -0.97518 | 2.42819  | H             | 0.00371  | -1.07497 | 2.30478  |
| H           | -1.03865 | 2.60097  | 0.02159  | H             | 0.80751  | 0.42324  | 2.45507  | H             | 0.81210  | 0.32992  | 2.40029  |
| H           | 1.57410  | 2.31391  | 0.02739  | N             | -1.59598 | 1.60665  | -0.34260 | N             | -1.58121 | 1.59831  | -0.30877 |
| H           | -0.82713 | -0.29391 | 2.38470  | H             | -1.38960 | 2.52231  | 0.04881  | H             | -1.33127 | 2.44559  | 0.20229  |
| H           | 1.05513  | -2.59170 | 0.18970  | H             | -1.67147 | 1.74370  | -1.34972 | H             | -1.74347 | 1.87470  | -1.27584 |
| H           | -2.60827 | -1.04548 | 0.10435  | H             | -2.53451 | 1.37843  | -0.02473 | H             | -2.48241 | 1.30265  | 0.06760  |

| $V(\text{NH}_3)_6$           | $V(\text{NH}_3)_6^+$         | $V(\text{NH}_3)_6^-$         |
|------------------------------|------------------------------|------------------------------|
| V 0.00000 0.00001 0.00001    | V 0.00000 0.00000 0.00000    | V 0.00000 -0.00001 -0.00001  |
| N 1.31502 1.21959 1.35760    | N -1.31328 -1.17049 1.42025  | N 1.33990 1.18933 1.36601    |
| H 1.43389 0.78247 2.27439    | H -1.48088 -0.67289 2.29569  | H 1.49540 0.72556 2.26353    |
| H 2.26115 1.34919 0.99215    | H -2.24183 -1.37702 1.05091  | H 2.27595 1.31982 0.97559    |
| N -1.31377 1.76160 -0.48010  | N 1.31041 -1.79665 -0.40833  | N -1.33906 1.75974 -0.43131  |
| H -1.43384 1.89006 -1.48747  | H 1.47879 -1.93757 -1.40527  | H -1.49570 1.89682 -1.43205  |
| H -2.25948 1.67390 -0.10137  | H 2.23864 -1.73634 0.01122   | H -2.27473 1.64262 -0.03574  |
| N -1.31606 -0.46461 1.76405  | N 1.31525 0.54329 1.75694    | N -1.34066 -0.50610 1.73848  |
| H -2.26254 -0.74510 1.49756  | H 2.24373 0.87398 1.49265    | H -2.27710 -0.78666 1.43843  |
| H -0.96485 -1.21715 2.36055  | H 0.93499 1.27485 2.35851    | H -1.01153 -1.26274 2.34022  |
| N -1.31540 -1.29475 -1.28571 | N 1.31367 1.24839 -1.35193   | N -1.34031 -1.25208 -1.30831 |
| H -0.96347 -1.43490 -2.23543 | H 0.93186 1.40354 -2.28565   | H -1.01095 -1.39472 -2.26440 |
| H -1.43377 -2.23248 -0.89538 | H 1.48285 2.18253 -0.97662   | H -1.49495 -2.18845 -0.92871 |
| N 1.31630 0.56420 -1.73457   | N -1.31548 -0.64122 -1.72344 | N 1.34092 0.58716 -1.71261   |
| H 1.43385 1.57671 -1.81647   | H -1.48418 -1.64799 -1.73133 | H 1.49477 1.59647 -1.76179   |
| H 2.26288 0.18443 -1.66193   | H -2.24358 -0.21712 -1.71612 | H 2.27753 0.18553 -1.62818   |
| N 1.31390 -1.78604 0.37872   | N -1.31056 1.81669 0.30652   | N 1.33922 -1.77802 0.34777   |
| H 2.25960 -1.53476 0.67538   | H -2.23857 1.60109 0.67205   | H 2.27493 -1.50541 0.65727   |
| H 0.95997 -2.41975 1.09888   | H -0.92714 2.51004 0.94988   | H 1.00799 -2.44678 1.04489   |
| H -2.26169 -0.92345 -1.39602 | H 2.24156 0.85337 -1.50768   | H -2.27666 -0.85176 -1.40145 |
| H -0.95979 2.65452 -0.12956  | H 0.92714 -2.68262 -0.07690  | H -1.00757 2.65947 -0.07986  |
| H -1.43390 0.34254 2.38076   | H 1.48303 -0.24937 2.37794   | H -1.49504 0.29103 2.35941   |
| H 0.96247 2.16078 1.54565    | H -0.93200 -2.07526 1.69899  | H 1.00955 2.12791 1.59592    |
| H 1.43400 -2.36105 -0.45833  | H -1.47949 2.32623 -0.56177  | H 1.49570 -2.32296 -0.50274  |
| H 0.96546 0.25395 -2.64349   | H -0.93493 -0.42947 -2.64648 | H 1.01239 0.31432 -2.64027   |



**Table S2.** Cartesian coordinates (Å) for the  $V(\text{NH}_3)_6^{0,\pm}$  species optimized at B3LYP/cc-pVTZ(V,N) aug-cc-pVTZ(H).

| $V(\text{NH}_3)_6$ |           |           | $V(\text{NH}_3)_6^+$ |   |           | $V(\text{NH}_3)_6^-$ |           |   |           |           |           |
|--------------------|-----------|-----------|----------------------|---|-----------|----------------------|-----------|---|-----------|-----------|-----------|
| V                  | -0.000019 | 0.000314  | -0.000384            | V | 0.000296  | 0.000438             | 0.000008  | V | 0.000145  | -0.000121 | 0.000046  |
| N                  | 1.304009  | 1.766639  | 0.526425             | N | -1.496275 | 0.696602             | 1.556484  | N | -1.366655 | -0.134879 | -1.797256 |
| H                  | 1.163194  | 2.098485  | 1.484316             | H | -1.846059 | 1.637050             | 1.364652  | H | -1.310224 | -1.031282 | -2.287218 |
| H                  | 2.301946  | 1.545271  | 0.449715             | H | -2.325844 | 0.103826             | 1.615523  | H | -2.349781 | -0.035884 | -1.522117 |
| N                  | -1.336839 | 1.296416  | -1.277568            | N | 1.455956  | -0.684081            | 1.599781  | N | 1.359456  | 1.506209  | -0.999682 |
| H                  | -1.183951 | 1.166778  | -2.281249            | H | 1.838046  | -1.611713            | 1.407238  | H | 1.307963  | 2.440066  | -0.584884 |
| H                  | -2.330222 | 1.101083  | -1.117098            | H | 2.266591  | -0.071730            | 1.704089  | H | 2.343081  | 1.226690  | -0.920457 |
| N                  | -1.364635 | 0.418839  | 1.748750             | N | 0.930554  | 2.068923             | 0.046054  | N | 1.359882  | -1.616925 | -0.808519 |
| H                  | -2.353763 | 0.333388  | 1.494020             | H | 1.862646  | 2.105508             | -0.369616 | H | 2.344196  | -1.403192 | -0.615024 |
| H                  | -1.220902 | -0.220595 | 2.534960             | H | 0.383867  | 2.777723             | -0.446416 | H | 1.195776  | -2.544922 | -0.410195 |
| N                  | -1.304831 | -1.767409 | -0.519389            | N | 1.480159  | -0.624532            | -1.602701 | N | 1.366725  | 0.110145  | 1.798686  |
| H                  | -1.124654 | -2.143484 | -1.454070            | H | 1.248587  | -1.512409            | -2.051977 | H | 1.205688  | 0.919716  | 2.403223  |
| H                  | -1.190831 | -2.552561 | 0.127133             | H | 1.542548  | 0.056604             | -2.361529 | H | 1.309204  | -0.711291 | 2.406677  |
| N                  | 1.364440  | -0.416164 | -1.749965            | N | -0.928185 | -2.069030            | 0.040211  | N | -1.359492 | 1.627736  | 0.786395  |
| H                  | 1.218236  | 0.222076  | -2.536609            | H | -1.120880 | -2.389425            | 0.990850  | H | -1.302319 | 2.499566  | 0.254045  |
| H                  | 2.353446  | -0.327263 | -1.495847            | H | -1.819177 | -2.131734            | -0.454775 | H | -2.343652 | 1.342956  | 0.738563  |
| N                  | 1.337807  | -1.298713 | 1.272332             | N | -1.442940 | 0.611405             | -1.640056 | N | -1.360220 | -1.491965 | 1.020062  |
| H                  | 2.329360  | -1.075189 | 1.140219             | H | -2.407704 | 0.702386             | -1.317774 | H | -2.344572 | -1.304945 | 0.800778  |
| H                  | 1.159638  | -1.203867 | 2.275746             | H | -1.214759 | 1.507028             | -2.075425 | H | -1.197698 | -2.465282 | 0.749807  |
| H                  | -2.301591 | -1.529305 | -0.499224            | H | 2.434513  | -0.734990            | -1.256366 | H | 2.350238  | 0.168897  | 1.513596  |
| H                  | -1.215547 | 2.297300  | -1.101007            | H | 1.040571  | -0.748007            | 2.531062  | H | 1.187788  | 1.631845  | -2.000420 |
| H                  | -1.253369 | 1.362542  | 2.128939             | H | 1.042352  | 2.423396             | 0.997592  | H | 1.300491  | -1.730776 | -1.823535 |
| H                  | 1.149079  | 2.577619  | -0.078483            | H | -1.119429 | 0.734194             | 2.505324  | H | -1.204943 | 0.584974  | -2.506106 |
| H                  | 1.244625  | -2.296111 | 1.062571             | H | -1.473718 | -0.063981            | -2.405846 | H | -1.299480 | -1.468668 | 2.041105  |
| H                  | 1.256071  | -1.360636 | -2.129281            | H | -0.333838 | -2.788802            | -0.375198 | H | -1.192951 | 1.882062  | 1.763302  |

**Table S3.** Cartesian coordinates (Å) for the  $V(\text{NH}_3)_6^{0,\pm}$  species optimized at MP2/cc-pVTZ(V,N) aug-cc-pVTZ(H) under  $C_{2v}$  symmetry.

| $V(\text{NH}_3)_6$ |          |          |          | $V(\text{NH}_3)_6^+$ |          |          |          | $V(\text{NH}_3)_6^-$ |          |          |          |
|--------------------|----------|----------|----------|----------------------|----------|----------|----------|----------------------|----------|----------|----------|
| V                  | -0.00000 | 0.00000  | 0.00004  | V                    | 0.00000  | -0.00000 | -0.00000 | V                    | 0.00000  | -0.00000 | 0.00010  |
| N                  | -2.25081 | 0.00000  | 0.00004  | N                    | -2.26284 | 0.00000  | -0.00000 | N                    | -2.25361 | 0.00000  | 0.00010  |
| N                  | -0.00000 | 1.59204  | -1.59201 | N                    | -0.00000 | 1.60017  | -1.60017 | N                    | -0.00000 | 1.59473  | -1.59463 |
| N                  | -0.00000 | 1.59204  | 1.59208  | N                    | -0.00000 | 1.60017  | 1.60017  | N                    | -0.00000 | 1.59473  | 1.59484  |
| N                  | -0.00000 | -1.59204 | 1.59208  | N                    | 0.00000  | -1.60017 | 1.60017  | N                    | -0.00000 | -1.59473 | 1.59484  |
| N                  | -0.00000 | -1.59204 | -1.59201 | N                    | 0.00000  | -1.60017 | -1.60017 | N                    | -0.00000 | -1.59473 | -1.59463 |
| N                  | 2.25081  | -0.00000 | 0.00004  | N                    | 2.26284  | -0.00000 | -0.00000 | N                    | 2.25361  | -0.00000 | 0.00010  |
| H                  | -2.65131 | 0.00000  | -0.94080 | H                    | -2.67258 | 0.00000  | -0.93474 | H                    | -2.64650 | 0.00000  | -0.94159 |
| H                  | 2.65131  | -0.00000 | -0.94080 | H                    | 2.67258  | -0.00000 | -0.93474 | H                    | 2.64650  | -0.00000 | -0.94159 |
| H                  | -2.65501 | -0.81341 | 0.46966  | H                    | -2.67242 | -0.80957 | 0.46740  | H                    | -2.65661 | -0.81182 | 0.46881  |
| H                  | -2.65501 | 0.81341  | 0.46966  | H                    | -2.67242 | 0.80957  | 0.46740  | H                    | -2.65661 | 0.81182  | 0.46881  |
| H                  | 2.65501  | 0.81341  | 0.46966  | H                    | 2.67242  | 0.80957  | 0.46740  | H                    | 2.65661  | 0.81182  | 0.46881  |
| H                  | 2.65501  | -0.81341 | 0.46966  | H                    | 2.67242  | -0.80957 | 0.46740  | H                    | 2.65661  | -0.81182 | 0.46881  |
| H                  | -0.00000 | 2.54390  | -1.21904 | H                    | -0.00000 | 2.55283  | -1.23470 | H                    | -0.00000 | 2.54901  | -1.22891 |
| H                  | -0.00000 | -2.54390 | -1.21904 | H                    | 0.00000  | -2.55283 | -1.23470 | H                    | -0.00000 | -2.54901 | -1.22891 |
| H                  | 0.81512  | 1.54208  | -2.20758 | H                    | 0.81058  | 1.55718  | -2.21902 | H                    | 0.81332  | 1.54997  | -2.21394 |
| H                  | -0.81512 | 1.54208  | -2.20758 | H                    | -0.81058 | 1.55718  | -2.21902 | H                    | -0.81332 | 1.54997  | -2.21394 |
| H                  | -0.81512 | -1.54208 | -2.20758 | H                    | -0.81058 | -1.55718 | -2.21902 | H                    | -0.81332 | -1.54997 | -2.21394 |
| H                  | 0.81512  | -1.54208 | -2.20758 | H                    | 0.81058  | -1.55718 | -2.21902 | H                    | 0.81332  | -1.54997 | -2.21394 |
| H                  | -0.00000 | 2.54390  | 1.21911  | H                    | -0.00000 | 2.55283  | 1.23469  | H                    | -0.00000 | 2.54901  | 1.22912  |
| H                  | -0.00000 | -2.54390 | 1.21911  | H                    | 0.00000  | -2.55283 | 1.23469  | H                    | -0.00000 | -2.54901 | 1.22912  |
| H                  | -0.81512 | 1.54208  | 2.20766  | H                    | -0.81058 | 1.55718  | 2.21901  | H                    | -0.81332 | 1.54997  | 2.21414  |
| H                  | 0.81512  | -1.54208 | 2.20766  | H                    | 0.81058  | -1.55718 | 2.21901  | H                    | 0.81332  | -1.54997 | 2.21414  |
| H                  | 0.81512  | 1.54208  | 2.20766  | H                    | 0.81058  | 1.55718  | 2.21901  | H                    | 0.81332  | 1.54997  | 2.21414  |
| H                  | -0.81512 | -1.54208 | 2.20766  | H                    | -0.81058 | -1.55718 | 2.21901  | H                    | -0.81332 | -1.54997 | 2.21414  |

**Table S4.** Harmonic vibrational frequencies ( $\text{cm}^{-1}$ ) for the  $\text{V}(\text{NH}_3)_{n=1-5}^{0,\pm}$  species at MP2/cc-pVTZ(V,N) aug-cc-pVTZ(H), and for  $\text{V}(\text{NH}_3)_6^{0,\pm}$  at DFT(B3LYP)/cc-pVTZ(V,N) aug-cc-pVTZ(H).

| $\text{V}(\text{NH}_3)$   | $\text{V}(\text{NH}_3)^+$   | $\text{V}(\text{NH}_3)^-$   |
|---------------------------|-----------------------------|-----------------------------|
| 322.1                     | 400.7                       | 321.1                       |
| 447.5                     | 584.8                       | 431.9                       |
| 448.1                     | 584.8                       | 432.3                       |
| 1206.8                    | 1333.8                      | 1188.4                      |
| 1640.5                    | 1661.6                      | 1615.5                      |
| 1640.8                    | 1662.1                      | 1615.6                      |
| 3411.9                    | 3448.8                      | 3323.7                      |
| 3562.5                    | 3560.7                      | 3452.2                      |
| 3563.1                    | 3560.9                      | 3452.3                      |
| $\text{V}(\text{NH}_3)_2$ | $\text{V}(\text{NH}_3)_2^+$ | $\text{V}(\text{NH}_3)_2^-$ |
| 20.1 <i>i</i>             | 23.1                        | 32.5 <i>i</i>               |
| 131.4                     | 122.9                       | 99.9                        |
| 131.6                     | 123.1                       | 99.9                        |
| 330.3                     | 345.1                       | 290.7                       |
| 398.9                     | 414.2                       | 361.0                       |
| 431.6                     | 533.8                       | 416.2                       |
| 444.1                     | 539.5                       | 416.4                       |
| 463.6                     | 565.2                       | 444.5                       |
| 464.9                     | 566.3                       | 444.5                       |
| 1167.8                    | 1297.2                      | 1106.9                      |
| 1174.4                    | 1299.7                      | 1123.4                      |
| 1627.8                    | 1663.4                      | 1620.2                      |
| 1627.9                    | 1664.8                      | 1620.2                      |
| 1630.8                    | 1665.4                      | 1621.7                      |
| 1631.6                    | 1666.1                      | 1621.7                      |
| 3391.7                    | 3460.8                      | 3349.9                      |
| 3397.4                    | 3461.2                      | 3358.1                      |
| 3550.9                    | 3575.4                      | 3516.8                      |
| 3551.1                    | 3576.5                      | 3517.0                      |
| 3551.2                    | 3576.9                      | 3517.4                      |
| 3552.2                    | 3576.9                      | 3517.6                      |

| $V(NH_3)_3$ | $V(NH_3)_3^+$ | $V(NH_3)_3^-$ |
|-------------|---------------|---------------|
| 57.6        | 10.9          | 47.9          |
| 92.1        | 23.3          | 86.1          |
| 97.5        | 32.9          | 115.2         |
| 101.5       | 35.7          | 123.7         |
| 117.7       | 42.0          | 130.3         |
| 160.9       | 60.6          | 138.2         |
| 310.9       | 116.5         | 322.1         |
| 329.1       | 120.1         | 338.0         |
| 393.0       | 121.6         | 395.7         |
| 445.0       | 147.4         | 479.3         |
| 456.1       | 148.1         | 487.5         |
| 467.3       | 155.6         | 490.2         |
| 467.8       | 159.2         | 510.8         |
| 509.5       | 161.1         | 524.9         |
| 634.6       | 161.7         | 577.8         |
| 1181.5      | 272.7         | 1184.0        |
| 1190.8      | 272.8         | 1193.4        |
| 1195.3      | 314.6         | 1241.5        |
| 1608.5      | 328.6         | 1578.1        |
| 1614.4      | 329.0         | 1611.0        |
| 1626.7      | 329.1         | 1618.8        |
| 1631.4      | 456.0         | 1628.6        |
| 1641.0      | 456.7         | 1630.2        |
| 1669.6      | 460.8         | 1636.0        |
| 3308.1      | 517.6         | 3287.7        |
| 3358.6      | 517.9         | 3336.8        |
| 3376.1      | 519.0         | 3358.2        |
| 3455.0      | 533.5         | 3400.9        |
| 3484.8      | 534.1         | 3430.5        |
| 3501.6      | 534.3         | 3489.8        |
| 3517.4      | 562.8         | 3499.2        |
| 3552.8      | 563.2         | 3501.2        |
| 3556.3      | 564.4         | 3504.8        |

| $V(\text{NH}_3)_4$ | $V(\text{NH}_3)_4^+$ | $V(\text{NH}_3)_4^-$ |
|--------------------|----------------------|----------------------|
| 52.8               | 36.3                 | 33.3 <i>i</i>        |
| 58.6               | 67.5                 | 71.1                 |
| 66.5               | 67.5                 | 71.1                 |
| 66.6               | 73.6                 | 88.5                 |
| 80.3               | 85.2                 | 94.6                 |
| 126.0              | 123.8                | 135.5                |
| 164.7              | 133.5                | 135.5                |
| 173.2              | 133.5                | 161.2                |
| 173.2              | 154.9                | 164.8                |
| 305.5              | 271.8                | 352.7                |
| 315.9              | 284.2                | 362.0                |
| 378.1              | 336.1                | 420.2                |
| 378.2              | 336.1                | 420.2                |
| 425.7              | 372.3                | 522.9                |
| 446.9              | 431.3                | 535.8                |
| 446.9              | 431.3                | 535.8                |
| 467.6              | 436.3                | 559.4                |
| 480.6              | 496.3                | 578.4                |
| 541.4              | 496.3                | 578.4                |
| 714.5              | 523.0                | 630.3                |
| 714.5              | 771.6                | 810.9                |
| 1185.2             | 1232.8               | 1266.7               |
| 1188.1             | 1238.8               | 1270.2               |
| 1546.1             | 1238.8               | 1326.6               |
| 1546.2             | 1248.1               | 1326.6               |
| 1615.3             | 1660.8               | 1594.8               |
| 1626.9             | 1665.7               | 1594.8               |
| 1631.5             | 1668.1               | 1605.0               |
| 1631.6             | 1668.1               | 1607.3               |
| 1634.8             | 1674.1               | 1608.1               |
| 1636.0             | 1674.1               | 1613.9               |
| 2802.7             | 1677.1               | 1668.8               |
| 2803.8             | 1683.1               | 1668.8               |
| 3336.8             | 3466.6               | 3305.9               |
| 3359.8             | 3471.7               | 3307.6               |
| 3490.1             | 3471.7               | 3307.6               |
| 3490.1             | 3472.8               | 3325.8               |
| 3496.5             | 3591.1               | 3414.9               |
| 3496.5             | 3591.1               | 3414.9               |
| 3498.4             | 3591.6               | 3428.5               |
| 3499.5             | 3593.4               | 3432.3               |
| 3518.1             | 3598.2               | 3433.8               |
| 3526.3             | 3598.9               | 3442.0               |
| 5497.1             | 3598.9               | 3442.0               |
| 5512.5             | 3599.0               | 3443.6               |

| $V(\text{NH}_3)_5$ | $V(\text{NH}_3)_5^+$ | $V(\text{NH}_3)_5^-$ |
|--------------------|----------------------|----------------------|
| 14.9 <i>i</i>      | 12.9 <i>i</i>        | 17.6 <i>i</i>        |
| 40.9               | 59.0                 | 57.6                 |
| 53.4               | 72.4                 | 71.2                 |
| 54.7               | 76.9                 | 75.2                 |
| 55.8               | 83.6                 | 83.0                 |
| 89.3               | 91.0                 | 85.6                 |
| 113.9              | 113.3                | 109.3                |
| 120.2              | 113.5                | 117.2                |
| 138.6              | 144.0                | 122.7                |
| 148.2              | 145.6                | 152.6                |
| 148.4              | 146.3                | 153.0                |
| 158.3              | 148.8                | 161.5                |
| 293.5              | 276.1                | 303.2                |
| 309.9              | 279.5                | 319.5                |
| 324.8              | 294.6                | 342.3                |
| 362.5              | 340.1                | 371.5                |
| 362.5              | 340.2                | 371.6                |
| 426.6              | 393.4                | 448.9                |
| 428.4              | 394.7                | 450.0                |
| 429.9              | 414.8                | 451.3                |
| 483.5              | 454.4                | 516.0                |
| 511.5              | 489.2                | 519.0                |
| 511.7              | 489.9                | 523.8                |
| 512.8              | 514.5                | 528.2                |
| 522.6              | 543.2                | 551.5                |
| 524.4              | 543.3                | 552.9                |
| 561.7              | 553.0                | 580.1                |
| 1206.1             | 1233.2               | 1207.6               |
| 1212.3             | 1238.3               | 1211.1               |
| 1215.2             | 1238.4               | 1213.2               |
| 1215.7             | 1243.6               | 1213.7               |
| 1233.0             | 1256.5               | 1233.5               |
| 1619.3             | 1641.7               | 1605.4               |
| 1620.3             | 1651.7               | 1609.2               |
| 1627.4             | 1651.7               | 1620.4               |
| 1634.8             | 1658.0               | 1622.8               |
| 1635.1             | 1659.4               | 1627.5               |
| 1639.8             | 1662.4               | 1629.1               |
| 1640.2             | 1662.5               | 1633.7               |
| 1644.0             | 1665.0               | 1635.0               |
| 1644.0             | 1670.6               | 1638.4               |
| 1646.6             | 1678.4               | 1638.5               |
| 3306.0             | 3422.8               | 3291.7               |
| 3378.0             | 3426.4               | 3363.4               |
| 3388.8             | 3427.1               | 3371.4               |
| 3389.2             | 3431.8               | 3371.6               |

|                                      |                                                  |                                                  |
|--------------------------------------|--------------------------------------------------|--------------------------------------------------|
| 3397.5                               | 3469.1                                           | 3374.4                                           |
| 3432.1                               | 3547.4                                           | 3416.6                                           |
| 3442.3                               | 3551.0                                           | 3426.1                                           |
| 3520.4                               | 3552.2                                           | 3490.9                                           |
| 3528.7                               | 3553.8                                           | 3502.4                                           |
| 3531.5                               | 3575.8                                           | 3504.4                                           |
| 3537.5                               | 3576.7                                           | 3513.3                                           |
| 3537.5                               | 3577.0                                           | 3520.3                                           |
| 3542.3                               | 3577.9                                           | 3527.0                                           |
| 3543.3                               | 3595.2                                           | 3530.7                                           |
| 3545.4                               | 3595.2                                           | 3534.0                                           |
| <b>V(NH<sub>3</sub>)<sub>6</sub></b> | <b>V(NH<sub>3</sub>)<sub>6</sub><sup>+</sup></b> | <b>V(NH<sub>3</sub>)<sub>6</sub><sup>-</sup></b> |
| 13.6                                 | 25.4 <i>i</i>                                    | 35.9 <i>i</i>                                    |
| 22.7                                 | 14.0                                             | 31.9 <i>i</i>                                    |
| 30.7                                 | 23.8                                             | 36.3                                             |
| 41.1                                 | 32.6                                             | 38.1                                             |
| 48.3                                 | 38.0                                             | 47.4                                             |
| 55.4                                 | 55.3                                             | 61.1                                             |
| 124.0                                | 116.2                                            | 119.7                                            |
| 125.2                                | 119.1                                            | 129.3                                            |
| 127.2                                | 119.5                                            | 130.1                                            |
| 151.0                                | 146.7                                            | 141.5                                            |
| 151.8                                | 147.8                                            | 141.9                                            |
| 153.2                                | 154.6                                            | 156.2                                            |
| 164.5                                | 158.3                                            | 161.4                                            |
| 166.0                                | 159.1                                            | 162.4                                            |
| 166.8                                | 160.4                                            | 180.0                                            |
| 283.2                                | 272.4                                            | 280.2                                            |
| 283.6                                | 272.7                                            | 280.3                                            |
| 320.2                                | 314.6                                            | 318.1                                            |
| 337.8                                | 328.1                                            | 334.2                                            |
| 338.7                                | 328.9                                            | 334.4                                            |
| 340.4                                | 329.4                                            | 338.6                                            |
| 463.8                                | 455.3                                            | 462.1                                            |
| 466.4                                | 455.3                                            | 476.9                                            |
| 466.5                                | 460.6                                            | 477.2                                            |
| 524.4                                | 516.3                                            | 527.0                                            |
| 525.0                                | 516.4                                            | 532.0                                            |
| 529.7                                | 519.1                                            | 532.1                                            |
| 547.6                                | 532.7                                            | 554.5                                            |
| 547.9                                | 533.6                                            | 555.1                                            |
| 549.4                                | 533.9                                            | 556.5                                            |
| 567.6                                | 562.2                                            | 557.0                                            |
| 567.7                                | 562.7                                            | 571.8                                            |
| 570.7                                | 563.3                                            | 585.0                                            |
| 1223.6                               | 1256.1                                           | 1116.8                                           |
| 1223.9                               | 1256.3                                           | 1117.0                                           |
| 1233.9                               | 1266.1                                           | 1225.0                                           |

|        |        |        |
|--------|--------|--------|
| 1237.9 | 1267.8 | 1225.1 |
| 1238.5 | 1268.2 | 1236.4 |
| 1248.0 | 1282.0 | 1251.7 |
| 1610.9 | 1630.2 | 1568.0 |
| 1611.5 | 1633.5 | 1568.8 |
| 1614.2 | 1633.5 | 1602.8 |
| 1614.4 | 1638.6 | 1603.1 |
| 1615.0 | 1639.1 | 1617.0 |
| 1615.6 | 1639.5 | 1620.0 |
| 1622.6 | 1639.7 | 1621.8 |
| 1622.9 | 1641.4 | 1622.1 |
| 1623.0 | 1641.5 | 1622.8 |
| 1623.2 | 1643.0 | 1624.5 |
| 1627.5 | 1644.5 | 1624.7 |
| 1630.9 | 1644.6 | 1634.6 |
| 3282.1 | 3331.9 | 3233.4 |
| 3282.3 | 3332.0 | 3234.2 |
| 3283.5 | 3334.5 | 3278.8 |
| 3283.8 | 3338.7 | 3279.9 |
| 3285.9 | 3338.8 | 3280.4 |
| 3303.5 | 3365.4 | 3292.5 |
| 3365.5 | 3432.9 | 3353.0 |
| 3371.9 | 3433.1 | 3361.1 |
| 3379.0 | 3436.5 | 3371.1 |
| 3379.3 | 3438.4 | 3371.9 |
| 3386.1 | 3438.4 | 3375.0 |
| 3386.3 | 3439.0 | 3375.8 |
| 3396.5 | 3442.1 | 3397.5 |
| 3396.9 | 3442.2 | 3398.8 |
| 3399.0 | 3445.5 | 3404.8 |
| 3399.2 | 3445.7 | 3405.9 |
| 3401.1 | 3447.0 | 3410.4 |
| 3413.5 | 3447.1 | 3417.4 |



**Table S5.** Cartesian coordinates (Å) and harmonic frequencies (cm<sup>-1</sup>) for the V(NH<sub>3</sub>)<sub>6</sub><sup>2+</sup> species optimized at MP2 and B3LYP/cc-pVTZ(V,N) aug-cc-pVTZ(H).

| <i>MP2 optimal geometry</i>     | <i>B3LYP optimal geometry</i>   | <i>B3LYP frequencies</i> |        |        |
|---------------------------------|---------------------------------|--------------------------|--------|--------|
| V -0.000002 -0.000009 -0.000015 | V -0.000045 -0.000140 -0.000086 | 29.7                     | 520.8  | 1690.8 |
| N 1.323993 1.193007 1.431527    | N -1.402829 -0.037514 1.813468  | 37.3                     | 522.1  | 3438.9 |
| H 1.523532 0.700501 2.299491    | H -1.611146 0.891566 2.173952   | 42.7                     | 583.7  | 3438.9 |
| H 2.242473 1.433243 1.065246    | H -2.314115 -0.453289 1.631665  | 47.1                     | 584.0  | 3439.0 |
| N -1.308901 1.826505 -0.419764  | N 1.264155 -1.706903 0.863801   | 78.9                     | 586.1  | 3439.4 |
| H -1.510871 1.957668 -1.408573  | H 1.488969 -2.422552 0.175455   | 92.5                     | 595.4  | 3439.5 |
| H -2.226002 1.806153 0.020682   | H 2.165807 -1.415620 1.235972   | 116.3                    | 599.0  | 3440.9 |
| N -1.333695 -0.541979 1.775685  | N 1.306362 1.523859 1.108263    | 118.5                    | 599.2  | 3518.5 |
| H -2.250876 -0.905654 1.526688  | H 2.237533 1.644242 0.714868    | 119.1                    | 1312.5 | 3518.6 |
| H -0.952581 -1.243582 2.406357  | H 0.921286 2.465377 1.147553    | 144.1                    | 1312.7 | 3519.1 |
| N -1.325053 -1.258945 -1.372944 | N 1.404319 0.118855 -1.808772   | 144.4                    | 1319.4 | 3519.4 |
| H -0.934925 -1.455786 -2.291798 | H 1.035013 -0.295044 -2.662312  | 149.4                    | 1321.5 | 3519.4 |
| H -1.536862 -2.179372 -0.993879 | H 1.636008 1.075292 -2.069637   | 169.0                    | 1321.8 | 3519.6 |
| N 1.334349 0.625433 -1.747567   | N -1.310240 -1.567766 -1.040616 | 170.4                    | 1342.3 | 3519.9 |
| H 1.544643 1.621141 -1.756583   | H -1.554172 -2.347783 -0.433515 | 171.0                    | 1658.7 | 3519.9 |
| H 2.248123 0.178199 -1.769497   | H -2.203803 -1.213520 -1.375890 | 260.3                    | 1666.8 | 3520.0 |
| N 1.309309 -1.844009 0.333084   | N -1.261688 1.669709 -0.936001  | 260.5                    | 1667.1 | 3520.2 |
| H 2.224316 -1.652192 0.734892   | H -2.188889 1.774603 -0.529000  | 304.4                    | 1674.0 | 3520.6 |
| H 0.913414 -2.552262 0.946994   | H -0.849247 2.598430 -0.876395  | 310.9                    | 1675.5 | 3520.7 |
| H -2.237978 -0.856490 -1.573146 | H 2.304831 -0.335879 -1.672377  | 311.2                    | 1675.7 |        |
| H -0.915035 2.718548 -0.129295  | H 0.824791 -2.217407 1.627065   | 312.4                    | 1677.4 |        |
| H -1.536451 0.249406 2.382594   | H 1.468544 1.274603 2.081948    | 453.4                    | 1677.4 |        |
| H 0.939334 2.083821 1.737680    | H -1.044444 -0.547736 2.618111  | 454.0                    | 1679.7 |        |
| H 1.515894 -2.350651 -0.525040  | H -1.431315 1.530011 -1.930107  | 460.4                    | 1688.6 |        |
| H 0.949880 0.447428 -2.672627   | H -0.885176 -2.003752 -1.856371 | 520.5                    | 1688.6 |        |

**Table S6.** Cartesian coordinates (Å) for the  $V(NH_3)_6^+$  species optimized at C-MP2/cc-pwCVTZ(V) cc-pVTZ(N) aug-cc-pVTZ(H) under  $C_{2v}$  symmetry.

| $V(NH_3)_6^+$ |           |           |           |
|---------------|-----------|-----------|-----------|
| V             | 0.000000  | 0.000000  | 0.000010  |
| N             | -2.232504 | 0.000000  | 0.000010  |
| N             | 0.000000  | 1.579245  | -1.579235 |
| N             | 0.000000  | 1.579245  | 1.579256  |
| N             | -0.000000 | -1.579245 | 1.579256  |
| N             | -0.000000 | -1.579245 | -1.579235 |
| N             | 2.232504  | -0.000000 | 0.000010  |
| H             | -2.642175 | 0.000000  | -0.935135 |
| H             | 2.642175  | -0.000000 | -0.935135 |
| H             | -2.643161 | -0.809485 | 0.467367  |
| H             | -2.643161 | 0.809485  | 0.467367  |
| H             | 2.643161  | 0.809485  | 0.467367  |
| H             | 2.643161  | -0.809485 | 0.467367  |
| H             | 0.000000  | 2.532685  | -1.214920 |
| H             | -0.000000 | -2.532685 | -1.214920 |
| H             | 0.810770  | 1.536419  | -2.198399 |
| H             | -0.810770 | 1.536419  | -2.198399 |
| H             | -0.810770 | -1.536419 | -2.198399 |
| H             | 0.810770  | -1.536419 | -2.198399 |
| H             | 0.000000  | 2.532685  | 1.214941  |
| H             | -0.000000 | -2.532685 | 1.214941  |
| H             | -0.810770 | 1.536419  | 2.198420  |
| H             | 0.810770  | -1.536419 | 2.198420  |
| H             | 0.810770  | 1.536419  | 2.198420  |
| H             | -0.810770 | -1.536419 | 2.198420  |

**Table S7.** Vertical electron attachment energies (eV) to **alpha** spin-orbital and pole strengths (in parentheses) of  $V(NH_3)_6^{2+}$ , at cation geometry (optimized at MP2 level), from diagonal electron propagator methods<sup>a</sup> using the cc-pVTZ/<sub>V</sub> cc-pVTZ/<sub>N</sub> d-aug-cc-pVTZ/<sub>H</sub> basis sets. All valence electrons correlated.

| No. | Orbital irrep | KT <sup>b</sup> | D2 <sup>c</sup> | OVGF <sup>d</sup> | P3 <sup>e</sup> | P3+ <sup>f</sup> |
|-----|---------------|-----------------|-----------------|-------------------|-----------------|------------------|
| 28  | a1            | -5.526          | -6.287(0.976)   | -6.228(0.975)     | -6.276(0.973)   | -6.277(0.974)    |
| 29  | a1            | -4.750          | -5.301(0.982)   | -5.268(0.981)     | -5.301(0.979)   | -5.301(0.979)    |
| 30  | b2            | -4.747          | -5.296(0.982)   | -5.264(0.981)     | -5.297(0.979)   | -5.297(0.979)    |
| 31  | b1            | -4.741          | -5.290(0.982)   | -5.257(0.981)     | -5.291(0.979)   | -5.290(0.979)    |
| 32  | b2            | -3.982          | -4.361(0.987)   | -4.342(0.986)     | -4.365(0.984)   | -4.365(0.984)    |
| 33  | a1            | -3.960          | -4.354(0.986)   | -4.336(0.985)     | -4.359(0.984)   | -4.359(0.984)    |
| 34  | a2            | -3.909          | -4.234(0.989)   | -4.223(0.988)     | -4.242(0.987)   | -4.241(0.987)    |
| 35  | b1            | -3.900          | -4.343(0.986)   | -4.325(0.984)     | -4.349(0.983)   | -4.349(0.983)    |
| 36  | a1            | -3.886          | -4.289(0.987)   | -4.275(0.986)     | -4.297(0.985)   | -4.296(0.985)    |
| 37  | b2            | -3.375          | -3.886(0.984)   | -3.857(0.983)     | -3.888(0.981)   | -3.888(0.982)    |
| 38  | a1            | -3.192          | -3.481(0.991)   | -3.454(0.990)     | -3.475(0.989)   | -3.476(0.990)    |
| 39  | b1            | -3.108          | -3.407(0.990)   | -3.395(0.989)     | -3.413(0.988)   | -3.413(0.988)    |
| 40  | a2            | -3.066          | -3.324(0.991)   | -3.317(0.990)     | -3.333(0.989)   | -3.332(0.989)    |
| 41  | a1            | -3.037          | -3.273(0.992)   | -3.269(0.991)     | -3.283(0.990)   | -3.282(0.990)    |
| 42  | a1            | -2.978          | -3.175(0.993)   | -3.174(0.992)     | -3.185(0.992)   | -3.184(0.992)    |
| 43  | b1            | -2.964          | -3.165(0.993)   | -3.164(0.992)     | -3.175(0.991)   | -3.174(0.992)    |
| 44  | b2            | -2.956          | -3.161(0.993)   | -3.160(0.992)     | -3.171(0.991)   | -3.170(0.991)    |
| 45  | b1            | -2.803          | -3.073(0.991)   | -3.050(0.991)     | -3.068(0.990)   | -3.068(0.990)    |

|    |    |        |               |               |               |               |
|----|----|--------|---------------|---------------|---------------|---------------|
| 46 | a1 | -2.799 | -3.065(0.991) | -3.043(0.991) | -3.061(0.990) | -3.061(0.990) |
| 47 | b2 | -2.798 | -3.066(0.991) | -3.044(0.991) | -3.062(0.990) | -3.062(0.990) |
| 48 | a1 | -2.439 | -2.719(0.991) | -2.699(0.990) | -2.717(0.990) | -2.717(0.990) |
| 49 | b1 | -2.432 | -2.707(0.991) | -2.689(0.991) | -2.706(0.990) | -2.706(0.990) |
| 50 | b2 | -2.409 | -2.597(0.993) | -2.583(0.993) | -2.595(0.992) | -2.595(0.993) |
| 51 | a1 | -2.390 | -2.573(0.994) | -2.562(0.993) | -2.573(0.993) | -2.573(0.993) |
| 52 | a2 | -2.377 | -2.543(0.994) | -2.534(0.994) | -2.545(0.993) | -2.545(0.994) |
| 53 | a2 | -2.162 | -2.279(0.996) | -2.278(0.995) | -2.285(0.995) | -2.285(0.995) |
| 54 | b1 | -2.156 | -2.259(0.996) | -2.259(0.996) | -2.265(0.995) | -2.265(0.996) |
| 55 | b2 | -2.153 | -2.271(0.996) | -2.269(0.996) | -2.276(0.995) | -2.276(0.995) |
| 56 | b1 | -1.963 | -2.137(0.994) | -2.126(0.994) | -2.137(0.993) | -2.137(0.993) |
| 57 | a1 | -1.955 | -2.240(0.991) | -2.231(0.990) | -2.248(0.989) | -2.247(0.989) |
| 58 | a2 | -1.945 | -2.137(0.993) | -2.127(0.993) | -2.139(0.992) | -2.139(0.992) |
| 59 | a1 | -1.917 | -2.071(0.995) | -2.066(0.994) | -2.075(0.994) | -2.074(0.994) |

<sup>a</sup> Accuracy of the methods increases from left to right. For a brief introduction to and numerical comparison of propagator methods, see, for example, Dolgounitcheva, O.; Díaz-Tinoco, M.; Zakrzewski, V. G.; Richard, R. M.; Marom, N.; Sherill, C. D.; Ortiz J. V. *J. Chem. Theory Comput.* **2016**, *12*, 627-637.

<sup>b</sup> Koopmans's theorem

<sup>c</sup> Diagonal second-order approximation

<sup>d</sup> Outer valence Green function method

<sup>e</sup> Partial third-order quasiparticle method

<sup>f</sup> Renormalized partial third-order quasiparticle method

**Table S8.** Vertical electron attachment energies (eV) to **beta** spin-orbital and pole strengths (in parentheses) of  $V(NH_3)_6^{2+}$ , at cation geometry (optimized at MP2 level), from diagonal electron propagator methods using the cc-pVTZ/<sub>V</sub> cc-pVTZ/<sub>N</sub> d-aug-cc-pVTZ/<sub>H</sub> basis sets. All valence electrons correlated.

| No. | Orbital irrep | KT     | D2            | OVGF          | P3            | P3+           |
|-----|---------------|--------|---------------|---------------|---------------|---------------|
| 25  | a1            | -5.516 | -6.275(0.976) | -6.215(0.975) | -6.264(0.973) | -6.265(0.974) |
| 26  | a1            | -4.746 | -5.293(0.982) | -5.260(0.981) | -5.293(0.979) | -5.293(0.979) |
| 27  | b2            | -4.742 | -5.289(0.982) | -5.256(0.981) | -5.289(0.979) | -5.289(0.979) |
| 28  | b1            | -4.736 | -5.283(0.982) | -5.249(0.981) | -5.283(0.979) | -5.283(0.979) |
| 29  | b2            | -3.993 | -4.378(0.986) | -4.359(0.985) | -4.383(0.984) | -4.382(0.984) |
| 30  | a1            | -3.968 | -4.364(0.986) | -4.345(0.985) | -4.369(0.984) | -4.368(0.984) |
| 31  | a2            | -3.911 | -4.237(0.989) | -4.225(0.988) | -4.244(0.987) | -4.244(0.987) |
| 32  | b1            | -3.888 | -4.316(0.986) | -4.300(0.985) | -4.323(0.983) | -4.323(0.984) |
| 33  | a1            | -3.877 | -4.273(0.987) | -4.259(0.986) | -4.281(0.985) | -4.281(0.985) |
| 34  | b2            | -3.369 | -3.880(0.984) | -3.850(0.983) | -3.883(0.981) | -3.882(0.982) |
| 35  | a1            | -3.192 | -3.483(0.991) | -3.456(0.990) | -3.477(0.989) | -3.478(0.989) |
| 36  | b1            | -3.108 | -3.406(0.990) | -3.394(0.989) | -3.412(0.988) | -3.412(0.988) |
| 37  | a2            | -3.069 | -3.333(0.991) | -3.325(0.990) | -3.341(0.989) | -3.341(0.989) |
| 38  | a1            | -3.036 | -3.272(0.992) | -3.268(0.991) | -3.282(0.990) | -3.281(0.990) |
| 39  | a1            | -2.977 | -3.174(0.993) | -3.173(0.992) | -3.184(0.992) | -3.184(0.992) |
| 40  | b1            | -2.962 | -3.161(0.993) | -3.160(0.992) | -3.171(0.991) | -3.170(0.992) |
| 41  | b2            | -2.956 | -3.160(0.993) | -3.159(0.992) | -3.170(0.991) | -3.169(0.991) |
| 42  | b1            | -2.797 | -3.063(0.991) | -3.040(0.991) | -3.059(0.990) | -3.059(0.990) |

|    |    |        |               |               |               |               |
|----|----|--------|---------------|---------------|---------------|---------------|
| 43 | b2 | -2.792 | -3.054(0.992) | -3.033(0.991) | -3.051(0.990) | -3.051(0.990) |
| 44 | a1 | -2.792 | -3.052(0.992) | -3.031(0.991) | -3.049(0.990) | -3.049(0.991) |
| 45 | a1 | -2.457 | -2.790(0.989) | -2.764(0.989) | -2.786(0.988) | -2.786(0.988) |
| 46 | b1 | -2.428 | -2.702(0.991) | -2.684(0.991) | -2.702(0.990) | -2.702(0.990) |
| 47 | b2 | -2.410 | -2.596(0.993) | -2.582(0.993) | -2.594(0.993) | -2.594(0.993) |
| 48 | a1 | -2.392 | -2.583(0.994) | -2.570(0.993) | -2.582(0.993) | -2.582(0.993) |
| 49 | a2 | -2.383 | -2.588(0.993) | -2.574(0.993) | -2.587(0.992) | -2.587(0.992) |
| 50 | a2 | -2.178 | -2.386(0.993) | -2.373(0.993) | -2.386(0.992) | -2.386(0.992) |
| 51 | b1 | -2.155 | -2.256(0.996) | -2.256(0.996) | -2.263(0.996) | -2.262(0.996) |
| 52 | b2 | -2.152 | -2.270(0.996) | -2.268(0.996) | -2.275(0.995) | -2.275(0.995) |
| 53 | a2 | -2.035 | -2.514(0.985) | -2.469(0.985) | -2.501(0.984) | -2.502(0.984) |
| 54 | a1 | -2.009 | -2.420(0.987) | -2.391(0.987) | -2.416(0.985) | -2.417(0.986) |
| 55 | b1 | -1.963 | -2.136(0.994) | -2.125(0.994) | -2.136(0.993) | -2.136(0.993) |
| 56 | a2 | -1.924 | -2.096(0.994) | -2.088(0.994) | -2.098(0.993) | -2.098(0.993) |
| 57 | a1 | -1.916 | -2.069(0.995) | -2.065(0.994) | -2.073(0.994) | -2.073(0.994) |
| 58 | a1 | -1.893 | -2.124(0.992) | -2.119(0.992) | -2.132(0.991) | -2.131(0.991) |
| 59 | b2 | -1.887 | -2.057(0.994) | -2.049(0.994) | -2.059(0.993) | -2.059(0.993) |

---

**Table S9.** Excitation energies (eV) for the quintet states of  $V(NH_3)_6^+$  inferred from electron affinities in Table S7.

| No. | Orbital irrep | KT    | D2    | OVGF  | P3    | P3+   |
|-----|---------------|-------|-------|-------|-------|-------|
| 28  | a1            | 0.000 | 0.000 | 0.000 | 0.000 | 0.000 |
| 29  | a1            | 0.776 | 0.986 | 0.960 | 0.975 | 0.976 |
| 30  | b2            | 0.779 | 0.991 | 0.964 | 0.979 | 0.980 |
| 31  | b1            | 0.785 | 0.997 | 0.971 | 0.985 | 0.987 |
| 32  | b2            | 1.544 | 1.926 | 1.886 | 1.911 | 1.912 |
| 33  | a1            | 1.566 | 1.933 | 1.892 | 1.917 | 1.918 |
| 34  | a2            | 1.617 | 2.053 | 2.005 | 2.034 | 2.036 |
| 35  | b1            | 1.626 | 1.944 | 1.903 | 1.927 | 1.928 |
| 36  | a1            | 1.640 | 1.998 | 1.953 | 1.979 | 1.981 |
| 37  | b2            | 2.151 | 2.401 | 2.371 | 2.388 | 2.389 |
| 38  | a1            | 2.334 | 2.806 | 2.774 | 2.801 | 2.801 |
| 39  | b1            | 2.418 | 2.880 | 2.833 | 2.863 | 2.864 |
| 40  | a2            | 2.460 | 2.963 | 2.911 | 2.943 | 2.945 |
| 41  | a1            | 2.489 | 3.014 | 2.959 | 2.993 | 2.995 |
| 42  | a1            | 2.548 | 3.112 | 3.054 | 3.091 | 3.093 |
| 43  | b1            | 2.562 | 3.122 | 3.064 | 3.101 | 3.103 |
| 44  | b2            | 2.570 | 3.126 | 3.068 | 3.105 | 3.107 |
| 45  | b1            | 2.723 | 3.214 | 3.178 | 3.208 | 3.209 |
| 46  | a1            | 2.727 | 3.222 | 3.185 | 3.215 | 3.216 |

|    |    |       |       |       |       |       |
|----|----|-------|-------|-------|-------|-------|
| 47 | b2 | 2.728 | 3.221 | 3.184 | 3.214 | 3.215 |
| 48 | a1 | 3.087 | 3.568 | 3.529 | 3.559 | 3.560 |
| 49 | b1 | 3.094 | 3.580 | 3.539 | 3.570 | 3.571 |
| 50 | b2 | 3.117 | 3.690 | 3.645 | 3.681 | 3.682 |
| 51 | a1 | 3.136 | 3.714 | 3.666 | 3.703 | 3.704 |
| 52 | a2 | 3.149 | 3.744 | 3.694 | 3.731 | 3.732 |
| 53 | a2 | 3.364 | 4.008 | 3.950 | 3.991 | 3.992 |
| 54 | b1 | 3.370 | 4.028 | 3.969 | 4.011 | 4.012 |
| 55 | b2 | 3.373 | 4.016 | 3.959 | 4.000 | 4.001 |
| 56 | b1 | 3.563 | 4.150 | 4.102 | 4.139 | 4.140 |
| 57 | a1 | 3.571 | 4.047 | 3.997 | 4.028 | 4.030 |
| 58 | a2 | 3.581 | 4.150 | 4.101 | 4.137 | 4.138 |
| 59 | a1 | 3.609 | 4.216 | 4.162 | 4.201 | 4.203 |

---



**Table S10.** Excitation energies (eV) for the triplet states of  $V(NH_3)_6^+$  inferred from electron affinities in Table S8.

| No. | Orbital irrep | KT    | D2    | OVGF  | P3    | P3+   |
|-----|---------------|-------|-------|-------|-------|-------|
| 25  | a1            | 0.010 | 0.012 | 0.013 | 0.012 | 0.012 |
| 26  | a1            | 0.780 | 0.994 | 0.968 | 0.983 | 0.984 |
| 27  | b2            | 0.784 | 0.998 | 0.972 | 0.987 | 0.988 |
| 28  | b1            | 0.790 | 1.004 | 0.979 | 0.993 | 0.994 |
| 29  | b2            | 1.533 | 1.909 | 1.869 | 1.893 | 1.895 |
| 30  | a1            | 1.558 | 1.923 | 1.883 | 1.907 | 1.909 |
| 31  | a2            | 1.615 | 2.050 | 2.003 | 2.032 | 2.033 |
| 32  | b1            | 1.638 | 1.971 | 1.928 | 1.953 | 1.954 |
| 33  | a1            | 1.649 | 2.014 | 1.969 | 1.995 | 1.996 |
| 34  | b2            | 2.157 | 2.407 | 2.378 | 2.393 | 2.395 |
| 35  | a1            | 2.334 | 2.804 | 2.772 | 2.799 | 2.799 |
| 36  | b1            | 2.418 | 2.881 | 2.834 | 2.864 | 2.865 |
| 37  | a2            | 2.457 | 2.954 | 2.903 | 2.935 | 2.936 |
| 38  | a1            | 2.490 | 3.015 | 2.960 | 2.994 | 2.996 |
| 39  | a1            | 2.549 | 3.113 | 3.055 | 3.092 | 3.093 |
| 40  | b1            | 2.564 | 3.126 | 3.068 | 3.105 | 3.107 |
| 41  | b2            | 2.570 | 3.127 | 3.069 | 3.106 | 3.108 |
| 42  | b1            | 2.729 | 3.224 | 3.188 | 3.217 | 3.218 |
| 43  | b2            | 2.734 | 3.233 | 3.195 | 3.225 | 3.226 |

|    |    |       |       |       |       |       |
|----|----|-------|-------|-------|-------|-------|
| 44 | a1 | 2.734 | 3.235 | 3.197 | 3.227 | 3.228 |
| 45 | a1 | 3.069 | 3.497 | 3.464 | 3.490 | 3.491 |
| 46 | b1 | 3.098 | 3.585 | 3.544 | 3.574 | 3.575 |
| 47 | b2 | 3.116 | 3.691 | 3.646 | 3.682 | 3.683 |
| 48 | a1 | 3.134 | 3.704 | 3.658 | 3.694 | 3.695 |
| 49 | a2 | 3.143 | 3.699 | 3.654 | 3.689 | 3.690 |
| 50 | a2 | 3.348 | 3.901 | 3.855 | 3.890 | 3.891 |
| 51 | b1 | 3.371 | 4.031 | 3.972 | 4.013 | 4.015 |
| 52 | b2 | 3.374 | 4.017 | 3.960 | 4.001 | 4.002 |
| 53 | a2 | 3.491 | 3.773 | 3.759 | 3.775 | 3.775 |
| 54 | a1 | 3.517 | 3.867 | 3.837 | 3.860 | 3.860 |
| 55 | b1 | 3.563 | 4.151 | 4.103 | 4.140 | 4.141 |
| 56 | a2 | 3.602 | 4.191 | 4.140 | 4.178 | 4.179 |
| 57 | a1 | 3.610 | 4.218 | 4.163 | 4.203 | 4.204 |
| 58 | a1 | 3.633 | 4.163 | 4.109 | 4.144 | 4.146 |
| 59 | b2 | 3.639 | 4.230 | 4.179 | 4.217 | 4.218 |

---

**Table S11.** Vertical electron attachment energies (eV) to **alpha** spin-orbital and pole strengths (in parentheses) of  $V(NH_3)_6^{2+}$ , at cation geometry (optimized at MP2 / cc-pwCVTZ(V) cc-pVTZ(N) aug-cc-pVTZ(H) level with all valence electrons and outer core electrons on Vanadium correlated), from diagonal electron propagator methods using the cc-pwCVTZ/V cc-pVTZ/N d-aug-cc-pVTZ/H basis sets. All valence electrons and outer core (3s3p) electrons on Vanadium correlated.

| No. | Orbital irrep | KT     | D2             | OvGF           | P3             | P3+            |
|-----|---------------|--------|----------------|----------------|----------------|----------------|
| 32  | a1            | -5.551 | -6.330 (0.976) | -6.261 (0.975) | -6.312 (0.973) | -6.314 (0.973) |
| 33  | a1            | -4.766 | -5.324 (0.982) | -5.286 (0.981) | -5.320 (0.979) | -5.320 (0.979) |
| 34  | b2            | -4.762 | -5.320 (0.982) | -5.282 (0.981) | -5.316 (0.979) | -5.316 (0.979) |
| 35  | b1            | -4.756 | -5.313 (0.982) | -5.276 (0.981) | -5.309 (0.979) | -5.310 (0.979) |
| 36  | b2            | -4.000 | -4.389 (0.986) | -4.366 (0.985) | -4.390 (0.984) | -4.390 (0.984) |
| 37  | a1            | -3.977 | -4.381 (0.986) | -4.358 (0.985) | -4.382 (0.984) | -4.382 (0.984) |
| 38  | a2            | -3.924 | -4.257 (0.989) | -4.242 (0.988) | -4.263 (0.987) | -4.262 (0.987) |
| 39  | b1            | -3.914 | -4.370 (0.985) | -4.345 (0.984) | -4.370 (0.983) | -4.370 (0.983) |
| 40  | a1            | -3.899 | -4.315 (0.987) | -4.294 (0.986) | -4.317 (0.984) | -4.317 (0.985) |
| 41  | b2            | -3.397 | -3.930 (0.983) | -3.891 (0.983) | -3.926 (0.981) | -3.927 (0.981) |
| 42  | a1            | -3.205 | -3.505 (0.990) | -3.473 (0.990) | -3.495 (0.989) | -3.496 (0.989) |
| 43  | b1            | -3.118 | -3.424 (0.989) | -3.410 (0.988) | -3.428 (0.987) | -3.428 (0.988) |
| 44  | a2            | -3.075 | -3.338 (0.991) | -3.330 (0.990) | -3.345 (0.989) | -3.345 (0.989) |
| 45  | a1            | -3.046 | -3.288 (0.992) | -3.282 (0.991) | -3.296 (0.990) | -3.295 (0.990) |
| 46  | a1            | -2.986 | -3.188 (0.993) | -3.186 (0.992) | -3.197 (0.992) | -3.196 (0.992) |
| 47  | b1            | -2.972 | -3.177 (0.993) | -3.175 (0.992) | -3.186 (0.991) | -3.185 (0.992) |
| 48  | b2            | -2.965 | -3.174 (0.993) | -3.172 (0.992) | -3.183 (0.991) | -3.182 (0.991) |

|    |    |        |                |                |                |                |
|----|----|--------|----------------|----------------|----------------|----------------|
| 49 | b1 | -2.807 | -3.080 (0.991) | -3.054 (0.991) | -3.073 (0.990) | -3.073 (0.990) |
| 50 | b2 | -2.803 | -3.073 (0.991) | -3.048 (0.991) | -3.066 (0.990) | -3.067 (0.990) |
| 51 | a1 | -2.802 | -3.071 (0.991) | -3.047 (0.991) | -3.064 (0.990) | -3.065 (0.990) |
| 52 | a1 | -2.448 | -2.734 (0.991) | -2.710 (0.990) | -2.729 (0.990) | -2.730 (0.990) |
| 53 | b1 | -2.440 | -2.722 (0.991) | -2.700 (0.991) | -2.719 (0.990) | -2.719 (0.990) |
| 54 | b2 | -2.418 | -2.609 (0.993) | -2.594 (0.993) | -2.606 (0.992) | -2.606 (0.992) |
| 55 | a1 | -2.397 | -2.584 (0.994) | -2.571 (0.993) | -2.583 (0.993) | -2.583 (0.993) |
| 56 | a2 | -2.383 | -2.552 (0.994) | -2.541 (0.994) | -2.552 (0.993) | -2.552 (0.994) |
| 57 | a2 | -2.164 | -2.283 (0.996) | -2.280 (0.995) | -2.288 (0.995) | -2.287 (0.995) |
| 58 | b1 | -2.157 | -2.263 (0.996) | -2.261 (0.996) | -2.268 (0.995) | -2.267 (0.996) |
| 59 | b2 | -2.156 | -2.278 (0.996) | -2.274 (0.996) | -2.282 (0.995) | -2.281 (0.995) |
| 60 | b1 | -1.970 | -2.147 (0.994) | -2.135 (0.993) | -2.146 (0.993) | -2.146 (0.993) |
| 61 | a1 | -1.967 | -2.249 (0.991) | -2.235 (0.990) | -2.252 (0.989) | -2.252 (0.989) |
| 62 | a2 | -1.950 | -2.141 (0.993) | -2.130 (0.993) | -2.142 (0.992) | -2.142 (0.993) |

---

**Table S12.** Vertical electron attachment energies (eV) to **beta** spin-orbital and pole strengths (in parentheses) of  $V(NH_3)_6^{2+}$ , at cation geometry (optimized at MP2 / cc-pwCVTZ(V) cc-pVTZ(N) aug-cc-pVTZ(H) level with all valence electrons and outer core electrons on Vanadium correlated), from diagonal electron propagator methods using the cc-pwCVTZ/V cc-pVTZ/N d-aug-cc-pVTZ/H basis sets. All valence electrons and outer core (3s3p) electrons on Vanadium correlated.

| No. | Orbital irrep | KT     | D2             | OVGF           | P3             | P3+            |
|-----|---------------|--------|----------------|----------------|----------------|----------------|
| 29  | a1            | -5.541 | -6.318 (0.976) | -6.248 (0.975) | -6.300 (0.973) | -6.302 (0.973) |
| 30  | a1            | -4.761 | -5.317 (0.982) | -5.279 (0.981) | -5.313 (0.979) | -5.313 (0.979) |
| 31  | b2            | -4.758 | -5.313 (0.982) | -5.275 (0.981) | -5.309 (0.979) | -5.309 (0.979) |
| 32  | b1            | -4.751 | -5.306 (0.982) | -5.268 (0.981) | -5.302 (0.979) | -5.302 (0.979) |
| 33  | b2            | -4.014 | -4.414 (0.986) | -4.389 (0.985) | -4.414 (0.984) | -4.414 (0.984) |
| 34  | a1            | -3.987 | -4.398 (0.986) | -4.372 (0.985) | -4.398 (0.984) | -4.398 (0.984) |
| 35  | a2            | -3.928 | -4.262 (0.989) | -4.246 (0.988) | -4.267 (0.987) | -4.267 (0.987) |
| 36  | b1            | -3.902 | -4.339 (0.986) | -4.319 (0.985) | -4.343 (0.983) | -4.342 (0.984) |
| 37  | a1            | -3.890 | -4.295 (0.987) | -4.277 (0.986) | -4.300 (0.985) | -4.299 (0.985) |
| 38  | b2            | -3.391 | -3.924 (0.983) | -3.884 (0.983) | -3.921 (0.981) | -3.921 (0.981) |
| 39  | a1            | -3.206 | -3.507 (0.990) | -3.474 (0.990) | -3.497 (0.989) | -3.498 (0.989) |
| 40  | b1            | -3.117 | -3.423 (0.989) | -3.408 (0.988) | -3.427 (0.987) | -3.427 (0.988) |
| 41  | a2            | -3.078 | -3.348 (0.991) | -3.338 (0.990) | -3.354 (0.989) | -3.354 (0.989) |
| 42  | a1            | -3.045 | -3.286 (0.992) | -3.280 (0.991) | -3.294 (0.990) | -3.294 (0.990) |
| 43  | a1            | -2.985 | -3.187 (0.993) | -3.185 (0.992) | -3.196 (0.992) | -3.195 (0.992) |
| 44  | b1            | -2.970 | -3.173 (0.993) | -3.171 (0.992) | -3.181 (0.991) | -3.181 (0.992) |
| 45  | b2            | -2.964 | -3.173 (0.993) | -3.170 (0.992) | -3.182 (0.991) | -3.181 (0.991) |

|    |    |        |                |                |                |                |
|----|----|--------|----------------|----------------|----------------|----------------|
| 46 | b1 | -2.802 | -3.070 (0.991) | -3.045 (0.991) | -3.064 (0.990) | -3.064 (0.990) |
| 47 | b2 | -2.797 | -3.062 (0.991) | -3.038 (0.991) | -3.056 (0.990) | -3.057 (0.990) |
| 48 | a1 | -2.796 | -3.059 (0.992) | -3.035 (0.991) | -3.053 (0.990) | -3.054 (0.991) |
| 49 | a1 | -2.467 | -2.814 (0.989) | -2.779 (0.989) | -2.804 (0.988) | -2.805 (0.988) |
| 50 | b1 | -2.436 | -2.717 (0.991) | -2.696 (0.991) | -2.714 (0.990) | -2.715 (0.990) |
| 51 | b2 | -2.420 | -2.609 (0.993) | -2.593 (0.993) | -2.606 (0.992) | -2.606 (0.993) |
| 52 | a1 | -2.398 | -2.591 (0.994) | -2.576 (0.993) | -2.589 (0.993) | -2.589 (0.993) |
| 53 | a2 | -2.387 | -2.585 (0.993) | -2.569 (0.993) | -2.583 (0.993) | -2.583 (0.993) |
| 54 | a2 | -2.181 | -2.409 (0.993) | -2.387 (0.992) | -2.403 (0.992) | -2.404 (0.992) |
| 55 | b1 | -2.156 | -2.259 (0.996) | -2.259 (0.996) | -2.265 (0.996) | -2.264 (0.996) |
| 56 | b2 | -2.155 | -2.276 (0.996) | -2.272 (0.996) | -2.280 (0.995) | -2.280 (0.995) |
| 57 | a2 | -2.038 | -2.545 (0.985) | -2.474 (0.985) | -2.512 (0.984) | -2.515 (0.984) |
| 58 | a1 | -2.017 | -2.443 (0.987) | -2.397 (0.987) | -2.426 (0.986) | -2.428 (0.986) |
| 59 | b1 | -1.969 | -2.146 (0.994) | -2.133 (0.993) | -2.144 (0.993) | -2.144 (0.993) |
| 60 | a2 | -1.929 | -2.108 (0.994) | -2.096 (0.994) | -2.108 (0.993) | -2.108 (0.993) |
| 61 | a1 | -1.928 | -2.133 (0.993) | -2.123 (0.993) | -2.135 (0.992) | -2.135 (0.992) |
| 62 | a1 | -1.910 | -2.106 (0.994) | -2.097 (0.993) | -2.108 (0.992) | -2.108 (0.993) |
| 63 | b2 | -1.895 | -2.069 (0.994) | -2.059 (0.994) | -2.069 (0.993) | -2.069 (0.993) |

---

**Table S13.** Excitation energies (eV) for the quintet states of  $V(NH_3)_6^+$  inferred from electron affinities in Table S11.

| No. | Orbital irrep | KT    | D2    | OVGF  | P3    | P3+   |
|-----|---------------|-------|-------|-------|-------|-------|
| 32  | a1 (1s)       | 0.000 | 0.000 | 0.000 | 0.000 | 0.000 |
| 33  | a1 (1p)       | 0.785 | 1.006 | 0.975 | 0.992 | 0.994 |
| 34  | b2 (1p)       | 0.789 | 1.010 | 0.979 | 0.996 | 0.998 |
| 35  | b1 (1p)       | 0.795 | 1.017 | 0.985 | 1.003 | 1.004 |
| 36  | b2 (1d)       | 1.551 | 1.941 | 1.895 | 1.922 | 1.924 |
| 37  | a1 (1d)       | 1.574 | 1.949 | 1.903 | 1.930 | 1.932 |
| 38  | a2 (1d)       | 1.627 | 2.073 | 2.019 | 2.049 | 2.052 |
| 39  | b1 (1d)       | 1.637 | 1.960 | 1.916 | 1.942 | 1.944 |
| 40  | a1 (1d)       | 1.652 | 2.015 | 1.967 | 1.995 | 1.997 |
| 41  | b2 (1f)       | 2.154 | 2.400 | 2.370 | 2.386 | 2.387 |
| 42  | a1 (2s)       | 2.346 | 2.825 | 2.788 | 2.817 | 2.818 |
| 43  | b1 (1f)       | 2.433 | 2.906 | 2.851 | 2.884 | 2.886 |
| 44  | a2 (1f)       | 2.476 | 2.992 | 2.931 | 2.967 | 2.969 |
| 45  | a1 (1f)       | 2.505 | 3.042 | 2.979 | 3.016 | 3.019 |
| 46  | a1 (1f)       | 2.565 | 3.142 | 3.075 | 3.115 | 3.118 |
| 47  | b1 (1f)       | 2.579 | 3.153 | 3.086 | 3.126 | 3.129 |
| 48  | b2 (1f)       | 2.586 | 3.156 | 3.089 | 3.129 | 3.132 |
| 49  | b1 (2p)       | 2.744 | 3.250 | 3.207 | 3.239 | 3.241 |
| 50  | b2 (2p)       | 2.748 | 3.257 | 3.213 | 3.246 | 3.247 |

|    |         |       |       |       |       |       |
|----|---------|-------|-------|-------|-------|-------|
| 51 | a1 (2p) | 2.749 | 3.259 | 3.214 | 3.248 | 3.249 |
| 52 | a1      | 3.103 | 3.596 | 3.551 | 3.583 | 3.584 |
| 53 | b1      | 3.111 | 3.608 | 3.561 | 3.593 | 3.595 |
| 54 | b2      | 3.133 | 3.721 | 3.667 | 3.706 | 3.708 |
| 55 | a1      | 3.154 | 3.746 | 3.690 | 3.729 | 3.731 |
| 56 | a2      | 3.168 | 3.778 | 3.720 | 3.760 | 3.762 |
| 57 | a2      | 3.387 | 4.047 | 3.981 | 4.024 | 4.027 |
| 58 | b1      | 3.394 | 4.067 | 4.000 | 4.044 | 4.047 |
| 59 | b2      | 3.395 | 4.052 | 3.987 | 4.030 | 4.033 |
| 60 | b1      | 3.581 | 4.183 | 4.126 | 4.166 | 4.168 |
| 61 | a1      | 3.584 | 4.081 | 4.026 | 4.060 | 4.062 |
| 62 | a2      | 3.601 | 4.189 | 4.131 | 4.170 | 4.172 |
| 63 | a1      | 3.624 | 4.214 | 4.154 | 4.194 | 4.196 |

---



**Table S14.** Excitation energies (eV) for the triplet states of  $V(NH_3)_6^+$  inferred from electron affinities in Table S12.

| No. | Orbital irrep | KT    | D2    | OVGF  | P3    | P3+   |
|-----|---------------|-------|-------|-------|-------|-------|
| 29  | a1 (1s)       | 0.010 | 0.012 | 0.013 | 0.012 | 0.012 |
| 30  | a1 (1p)       | 0.790 | 1.013 | 0.982 | 0.999 | 1.001 |
| 31  | b2 (1p)       | 0.793 | 1.017 | 0.986 | 1.003 | 1.005 |
| 32  | b1 (1p)       | 0.800 | 1.024 | 0.993 | 1.010 | 1.012 |
| 33  | b2 (1d)       | 1.537 | 1.916 | 1.872 | 1.898 | 1.900 |
| 34  | a1 (1d)       | 1.564 | 1.932 | 1.889 | 1.914 | 1.916 |
| 35  | a2 (1d)       | 1.623 | 2.068 | 2.015 | 2.045 | 2.047 |
| 36  | b1 (1d)       | 1.649 | 1.991 | 1.942 | 1.969 | 1.972 |
| 37  | a1 (1d)       | 1.661 | 2.035 | 1.984 | 2.012 | 2.015 |
| 38  | b2 (1f)       | 2.160 | 2.406 | 2.377 | 2.391 | 2.393 |
| 39  | a1 (2s)       | 2.345 | 2.823 | 2.787 | 2.815 | 2.816 |
| 40  | b1 (1f)       | 2.434 | 2.907 | 2.853 | 2.885 | 2.887 |
| 41  | a2 (1f)       | 2.473 | 2.982 | 2.923 | 2.958 | 2.960 |
| 42  | a1 (1f)       | 2.506 | 3.044 | 2.981 | 3.018 | 3.020 |
| 43  | a1 (1f)       | 2.566 | 3.143 | 3.076 | 3.116 | 3.119 |
| 44  | b1 (1f)       | 2.581 | 3.157 | 3.090 | 3.131 | 3.133 |
| 45  | b2 (1f)       | 2.587 | 3.157 | 3.091 | 3.130 | 3.133 |
| 46  | b1 (2p)       | 2.749 | 3.260 | 3.216 | 3.248 | 3.250 |
| 47  | b2 (2p)       | 2.754 | 3.268 | 3.223 | 3.256 | 3.257 |

|    |         |       |       |       |       |       |
|----|---------|-------|-------|-------|-------|-------|
| 48 | a1 (2p) | 2.755 | 3.271 | 3.226 | 3.259 | 3.260 |
| 49 | a1      | 3.084 | 3.516 | 3.482 | 3.508 | 3.509 |
| 50 | b1      | 3.115 | 3.613 | 3.565 | 3.598 | 3.599 |
| 51 | b2      | 3.131 | 3.721 | 3.668 | 3.706 | 3.708 |
| 52 | a1      | 3.153 | 3.739 | 3.685 | 3.723 | 3.725 |
| 53 | a2      | 3.164 | 3.745 | 3.692 | 3.729 | 3.731 |
| 54 | a2      | 3.370 | 3.921 | 3.874 | 3.909 | 3.910 |
| 55 | b1      | 3.395 | 4.071 | 4.002 | 4.047 | 4.050 |
| 56 | b2      | 3.396 | 4.054 | 3.989 | 4.032 | 4.034 |
| 57 | a2      | 3.513 | 3.785 | 3.787 | 3.800 | 3.799 |
| 58 | a1      | 3.534 | 3.887 | 3.864 | 3.886 | 3.886 |
| 59 | b1      | 3.582 | 4.184 | 4.128 | 4.168 | 4.170 |
| 60 | a2      | 3.622 | 4.222 | 4.165 | 4.204 | 4.206 |
| 61 | a1      | 3.623 | 4.197 | 4.138 | 4.177 | 4.179 |
| 62 | a1      | 3.641 | 4.224 | 4.164 | 4.204 | 4.206 |
| 63 | b2      | 3.656 | 4.261 | 4.202 | 4.243 | 4.245 |

---

(1) Ariyaratna, I. R.; Pawłowski, F.; Ortiz, J. V.; Miliordos, E. *Phys. Chem. Chem. Phys.* **2018**, *20*, 24186.

(2) Ariyaratna, I. R.; Khan, S. N.; Pawłowski, F.; Ortiz, J. V.; Miliordos, E. *J. Phys. Chem. Lett.* **2018**, *9*, 84.

(1) Ariyaratna, I. R.; Pawłowski, F.; Ortiz, J. V.; Miliordos, E. *Phys. Chem. Chem. Phys.* **2018**, *20*, 24186.



**Table S15.** Calculation of the adiabatic electron binding energies (aEBE) for  $V(NH_3)_6^{2+,0}$  (species A): The P3+ vertical EBE (vEBE) values using  $C_{2v}$  geometries are corrected for the relaxation energies ( $E_{relax}$ ) from the  $C_{2v}$  to  $C_1$  structures and zero-point energies (ZPE) of species A and the produced species B,  $V(NH_3)_6^{+,0,-}$ . All values in eV.

| Species A                           | $V(NH_3)_6^{2+}$  | $V(NH_3)_6$       | $V(NH_3)_6$       |
|-------------------------------------|-------------------|-------------------|-------------------|
| Species B                           | $V(NH_3)_6^+$     | $V(NH_3)_6^+$     | $V(NH_3)_6^-$     |
| $C_{2v}$ geometry used <sup>a</sup> | $V(NH_3)_6^+$     | $V(NH_3)_6$       | $V(NH_3)_6^-$     |
| vEBE <sup>b</sup>                   | 6.26              | 3.44              | 0.46              |
| $E_{relax}(A)$ <sup>c</sup>         | 0.075             | 0.018             | 0.020             |
| $E_{relax}(B)$ <sup>c</sup>         | 0.009             | 0.034             | 0.013             |
| ZPE(A) <sup>d</sup>                 | 6.248             | 6.014             | 6.014             |
| ZPE(B) <sup>d</sup>                 | 6.085             | 6.085             | 5.984             |
| aEBE                                | 6.36 <sup>e</sup> | 3.50 <sup>f</sup> | 0.48 <sup>e</sup> |

<sup>a</sup> MP2 optimized geometries using the cc-pVTZ (V,N) and aug-cc-pVTZ (H) basis sets (see Table S3).

<sup>b</sup> Calculated with P3+ using with the cc-pVTZ (V,N) and d-aug-cc-pVTZ (H) basis sets.

<sup>c</sup> The absolute energies are given in Table S16.

<sup>d</sup> Calculated as half of the sum of all B3LYP harmonic vibrational frequencies using the cc-pVTZ (V,N) and aug-cc-pVTZ (H) basis sets (see Table S4).

<sup>e</sup> Calculated as  $aEBE = vEBE + E_{relax}(B) - E_{relax}(A) + ZPE(A) - ZPE(B)$ .

<sup>f</sup> Calculated as  $aEBE = vEBE + E_{relax}(A) - E_{relax}(B) + ZPE(B) - ZPE(A)$ .

**Table S16.** Absolute energies for species A and B of Table S15: Energies for the optimal  $C_{2v}$  and  $C_1$  structures (in parenthesis) of Tables S1 and S3.

| Species/Geom     | $V(NH_3)_6^{2+}$               | $V(NH_3)_6^+$                  | $V(NH_3)_6$                    | $V(NH_3)_6^-$                  |
|------------------|--------------------------------|--------------------------------|--------------------------------|--------------------------------|
| $V(NH_3)_6^{2+}$ | -1281.495370<br>(-1281.496868) | -1281.494109                   |                                |                                |
| $V(NH_3)_6^+$    |                                | -1281.726157<br>(-1281.726482) | -1281.725229                   |                                |
| $V(NH_3)_6$      |                                |                                | -1281.850088<br>(-1281.850740) | -1281.849997                   |
| $V(NH_3)_6^-$    |                                |                                |                                | -1281.849578<br>(-1281.850051) |
